# Supplementary material
Source: publisher figshare collection journal article supplement (https://geolsoc.figshare.com/articles/dataset/_/3452993)
Supplement: Supplementary file 2 [file 1]

### **Supplementary Material: Sample localities**

All coordinates were determined using the Global Positioning System with WGS84 as the datum, and accuracy probably better than  $0.0005^\circ$  (about 50 m).

08-035 (K06-455). Dark grey trachyte with large (1 mm+) bladed alkali feldspar crystals as phenocrysts. Collected from the Barrier, adjacent to the southern shores of Lake Turkana at  $2.3179^\circ\text{N}$ ,  $36.6203^\circ\text{E}$ . Alkali feldspars separated were 0.5 to 1.4 mm in size.

08-024. Small pumice clasts up to 15 mm across from Tuff K, Errum, in the Shungura Formation at  $4.8722^\circ\text{N}$ ,  $35.9433^\circ\text{E}$ , elevation about 410 m, yielded alkali feldspar for dating. Outcrop of Tuff K-alpha and Tuff K-beta are in a cuesta, with an ~1.2 m silty bed between the tuffs.

08-031A, B, C (K04-368). Three individual rounded pumice clasts, with maximum dimension about 50 mm, from the Orange Tuff in the KBS Member, Koobi Fora Formation in Area 109, Koobi Fora,  $3.8184^\circ\text{N}$ ,  $36.2617^\circ\text{E}$ .

08-029. Small rounded pumice clasts rarely up to 20 mm across, from Tuff G at the base of Member G, Shungura Formation at an altitude of about 434 m at  $5.0815^\circ\text{N}$ ,  $36.0095^\circ\text{E}$ . This locality is near the American Camp used during the Omo Research Expedition in the late 1960s. Single crystals of alkali feldspar (and quartz) were separated from an aggregate sample of pumice clasts.

08-032A, B (K04-374). Pumice clasts from the Burgi Tuff at the base of the Burgi Member, Koobi Fora Formation in Area 202, Koobi Fora, at the type 'Suregei isolate' site, with coordinates  $3.7878^\circ\text{N}$ ,  $36.3340^\circ\text{E}$ . 08-032A consists of alkali feldspar from a single pumice clast 40 x 25 x 25 mm, mass about 11 g, whereas 08-032B was alkali feldspar separated from a composite of two pumice clasts with maximum dimensions of 25 mm and combined mass of about 4.5 g.

08-026A, B. Small (usually <10 mm across) pumice clasts from Tuff C-gamma, Member C, Shungura Formation, at an altitude of about 400 m, at 5.0639°N, 36.0251°E. Processed as two composite samples, with most crystals being calcic oligoclase.

08-020A, B; 08-034A, B. Samples 08-020A and B were collected by IMcD in 2008, whereas samples 08-034A and B were collected by FHB in 2004, as samples E04-006. Rounded pumice clasts up to 55 mm in size with sporadic alkali feldspar phenocrysts, which were separated. From Tuff B-delta, deposited as a tuffitic sand in a channel cut into Tuff B-gamma and Tuff B-beta (=Tulu Bor Tuff), Member B, Shungura Formation at 5.0533°N, 36.0294°E.

08-036A to F (MB08-06). Pumice clasts up to 13 cm in size collected by MJB from the Naibar Tuff, Lonyumun Member, Koobi Fora Formation in Area 117, Koobi Fora, 4.0973°N, 36.2904°E. Collected from a small channel where the Naibar Tuff crops out along the south side of II Naibar. Alkali feldspars were separated from each of 6 pumice clasts.

Supplementary Table 1. Results of laser fusion  $^{40}\text{Ar}/^{39}\text{Ar}$  dating of single crystals of sanidine from the Alder Creek Rhyolite (ACs)

| Run No.                      | $^{36}\text{Ar}/^{39}\text{Ar}$<br>$\times 10^{-3} \pm \text{c.v.}$ | $^{37}\text{Ar}/^{39}\text{Ar}$<br>$\times 10^{-2} \pm \text{c.v.}$ | $^{40}\text{Ar}/^{39}\text{Ar}$<br>$\pm \text{c.v.}$ | K/Ca              | $^{40}\text{Ar}^*/^{39}\text{Ar}_K$<br>$\pm \text{c.v.}$ | % $^{40}\text{Ar}^*$ | $^{40}\text{Ar}$ mol<br>ge<br>$\times 10^{-14}$ | Calculated<br>Ma $\pm 1 \text{ s.d.}$ |
|------------------------------|---------------------------------------------------------------------|---------------------------------------------------------------------|------------------------------------------------------|-------------------|----------------------------------------------------------|----------------------|-------------------------------------------------|---------------------------------------|
| $J = 2.690E-4 \pm 0.26\%$    |                                                                     |                                                                     |                                                      |                   |                                                          |                      |                                                 |                                       |
| 5631-01                      | 0.3339 $\pm$ 32.3%                                                  | 2.6600 $\pm$ 185%                                                   | 2.5374 $\pm$ 0.40%                                   | 19.2              | 2.4395 $\pm$ 1.37%                                       | 96.1                 | 1.48                                            | 1.183 $\pm$ 0.017                     |
| -02                          | 0.3405 $\pm$ 19.6%                                                  | 7.4871 $\pm$ 45.8%                                                  | 2.5367 $\pm$ 0.41%                                   | 6.8               | 2.4408 $\pm$ 0.92%                                       | 96.2                 | 2.07                                            | 1.184 $\pm$ 0.011                     |
| -03                          | 0.5202 $\pm$ 21.6%                                                  | 20.563 $\pm$ 25.2%                                                  | 2.5575 $\pm$ 0.43%                                   | 2.5               | 2.4183 $\pm$ 1.45%                                       | 94.5                 | 1.34                                            | 1.173 $\pm$ 0.017                     |
| -04                          | 0.2553 $\pm$ 21.9%                                                  | 2.5081 $\pm$ 111%                                                   | 2.5401 $\pm$ 0.39%                                   | 20.3              | 2.4652 $\pm$ 0.78%                                       | 97.1                 | 2.54                                            | 1.195 $\pm$ 0.010                     |
| -05                          | 0.2973 $\pm$ 21.6%                                                  | 2.6280 $\pm$ 101%                                                   | 2.4913 $\pm$ 0.44%                                   | 19.4              | 2.4040 $\pm$ 0.91%                                       | 96.5                 | 2.30                                            | 1.166 $\pm$ 0.011                     |
| -06                          | 0.3075 $\pm$ 25.0%                                                  | 6.4728 $\pm$ 53.4%                                                  | 2.5665 $\pm$ 0.36%                                   | 7.9               | 2.4792 $\pm$ 0.99%                                       | 96.6                 | 1.98                                            | 1.202 $\pm$ 0.012                     |
| -07                          | 0.4247 $\pm$ 12.3%                                                  | -                                                                   | 2.5737 $\pm$ 0.38%                                   | -                 | 2.4469 $\pm$ 0.75%                                       | 95.1                 | 2.93                                            | 1.187 $\pm$ 0.010                     |
| -08                          | 0.4255 $\pm$ 15.2%                                                  | 2.6637 $\pm$ 112%                                                   | 2.5727 $\pm$ 0.39%                                   | 19.2              | 2.4476 $\pm$ 0.88%                                       | 95.1                 | 2.24                                            | 1.187 $\pm$ 0.011                     |
| -09                          | 0.7290 $\pm$ 9.67%                                                  | 0.5483 $\pm$ 536%                                                   | 2.6552 $\pm$ 0.36%                                   | 93.0              | 2.4388 $\pm$ 0.94%                                       | 91.9                 | 2.39                                            | 1.183 $\pm$ 0.012                     |
| -10                          | 0.1896 $\pm$ 18.3%                                                  | 1.7773 $\pm$ 97.7%                                                  | 2.4836 $\pm$ 0.36%                                   | 28.7              | 2.4276 $\pm$ 0.56%                                       | 97.7                 | 4.15                                            | 1.177 $\pm$ 0.008                     |
| Arithmetic mean K/Ca (n = 9) |                                                                     |                                                                     |                                                      | 24.1 $\pm$ 27.1   | Arithmetic mean age (n = 10)                             |                      | 1.184 $\pm$ 0.010                               |                                       |
|                              |                                                                     |                                                                     |                                                      |                   | Weighted mean age (n = 10)                               |                      | 1.183 $\pm$ 0.005                               |                                       |
| $J = 2.690E-4 \pm 0.26\%$    |                                                                     |                                                                     |                                                      |                   |                                                          |                      |                                                 |                                       |
| 5635-01                      | 0.5058 $\pm$ 24.2%                                                  | -                                                                   | 2.5548 $\pm$ 0.55%                                   | -                 | 2.4064 $\pm$ 1.61%                                       | 94.2                 | 1.10                                            | 1.167 $\pm$ 0.019                     |
| -02                          | 0.8347 $\pm$ 12.2%                                                  | 8.0412 $\pm$ 63.7%                                                  | 2.6305 $\pm$ 0.49%                                   | 6.4               | 2.3887 $\pm$ 1.37%                                       | 90.8                 | 1.44                                            | 1.158 $\pm$ 0.016                     |
| -03                          | 0.5357 $\pm$ 12.3%                                                  | 8.8706 $\pm$ 35.5%                                                  | 2.5813 $\pm$ 0.38%                                   | 5.8               | 2.4285 $\pm$ 0.90%                                       | 94.1                 | 2.07                                            | 1.178 $\pm$ 0.011                     |
| -04                          | 1.0667 $\pm$ 9.46%                                                  | 0.1949 $\pm$ 1628%                                                  | 2.7622 $\pm$ 0.38%                                   | 261.8             | 2.4455 $\pm$ 1.29%                                       | 88.5                 | 1.89                                            | 1.186 $\pm$ 0.016                     |
| -05                          | 0.2252 $\pm$ 21.8%                                                  | -                                                                   | 2.5468 $\pm$ 0.43%                                   | -                 | 2.4791 $\pm$ 0.73%                                       | 97.3                 | 3.31                                            | 1.202 $\pm$ 0.010                     |
| -06                          | 0.1070 $\pm$ 109%                                                   | 5.4055 $\pm$ 120%                                                   | 2.5578 $\pm$ 0.52%                                   | 9.4               | 2.5291 $\pm$ 1.46%                                       | 98.9                 | 1.26                                            | 1.226 $\pm$ 0.018                     |
| -07                          | 0.1553 $\pm$ 64.2%                                                  | 5.8709 $\pm$ 108%                                                   | 2.5574 $\pm$ 0.42%                                   | 8.7               | 2.5145 $\pm$ 1.26%                                       | 98.3                 | 1.57                                            | 1.219 $\pm$ 0.016                     |
| -08                          | 0.1840 $\pm$ 58.5%                                                  | -                                                                   | 2.5579 $\pm$ 0.46%                                   | -                 | 2.5025 $\pm$ 1.36%                                       | 97.8                 | 1.44                                            | 1.214 $\pm$ 0.017                     |
| -09                          | 2.1415 $\pm$ 3.63%                                                  | -                                                                   | 3.0596 $\pm$ 0.43%                                   | -                 | 2.4267 $\pm$ 1.08%                                       | 79.3                 | 2.87                                            | 1.177 $\pm$ 0.013                     |
| -10                          | 0.8408 $\pm$ 13.2%                                                  | 8.5265 $\pm$ 60.8%                                                  | 2.5518 $\pm$ 0.41%                                   | 6.0               | 2.4366 $\pm$ 1.50%                                       | 95.5                 | 1.30                                            | 1.182 $\pm$ 0.018                     |
| Arithmetic mean K/Ca (n = 6) |                                                                     |                                                                     |                                                      | 49.7 $\pm$ 103.9  | Arithmetic mean age (n = 10)                             |                      | 1.191 $\pm$ 0.023                               |                                       |
|                              |                                                                     |                                                                     |                                                      |                   | Weighted mean age (n = 10)                               |                      | 1.191 $\pm$ 0.007                               |                                       |
| $J = 2.689E-4 \pm 0.30\%$    |                                                                     |                                                                     |                                                      |                   |                                                          |                      |                                                 |                                       |
| 5654-01                      | 0.3301 $\pm$ 25.9%                                                  | 3.5324 $\pm$ 157%                                                   | 2.5451 $\pm$ 0.39%                                   | 14.4              | 2.4490 $\pm$ 1.11%                                       | 96.2                 | 1.69                                            | 1.188 $\pm$ 0.014                     |
| -02                          | 0.3237 $\pm$ 25.0%                                                  | -                                                                   | 2.5412 $\pm$ 0.41%                                   | -                 | 2.4443 $\pm$ 1.07%                                       | 96.2                 | 2.00                                            | 1.186 $\pm$ 0.013                     |
| -03                          | 0.2378 $\pm$ 34.2%                                                  | 7.0928 $\pm$ 58.2%                                                  | 2.5376 $\pm$ 0.42%                                   | 7.2               | 2.4716 $\pm$ 1.06%                                       | 97.4                 | 1.85                                            | 1.199 $\pm$ 0.013                     |
| -04                          | 10.1483 $\pm$ 1.35%                                                 | 13.3066 $\pm$ 31.7%                                                 | 2.3530 $\pm$ 0.36%                                   | 3.8               | 2.3630 $\pm$ 2.00%                                       | 44.1                 | 4.00                                            | 1.146 $\pm$ 0.023                     |
| -05                          | 0.1913 $\pm$ 41.9%                                                  | 4.2322 $\pm$ 116%                                                   | 2.5194 $\pm$ 0.37%                                   | 12.1              | 2.4648 $\pm$ 1.04%                                       | 97.8                 | 1.77                                            | 1.196 $\pm$ 0.013                     |
| -06                          | 0.4337 $\pm$ 22.2%                                                  | -                                                                   | 2.5507 $\pm$ 0.43%                                   | -                 | 2.4210 $\pm$ 1.27%                                       | 94.9                 | 1.58                                            | 1.174 $\pm$ 0.015                     |
| -07                          | 0.4036 $\pm$ 17.5%                                                  | 8.0780 $\pm$ 48.3%                                                  | 2.5552 $\pm$ 0.43%                                   | 6.3               | 2.4408 $\pm$ 0.96%                                       | 95.5                 | 2.06                                            | 1.184 $\pm$ 0.012                     |
| -08                          | 6.4251 $\pm$ 1.71%                                                  | 6.9881 $\pm$ 63.9%                                                  | 4.3926 $\pm$ 0.36%                                   | 7.3               | 2.4979 $\pm$ 1.49%                                       | 56.9                 | 3.82                                            | 1.212 $\pm$ 0.018                     |
| -09                          | 0.5778 $\pm$ 14.0%                                                  | 3.5904 $\pm$ 98.4%                                                  | 2.5710 $\pm$ 0.42%                                   | 14.2              | 2.4016 $\pm$ 1.09%                                       | 93.4                 | 2.07                                            | 1.165 $\pm$ 0.013                     |
| -10                          | 0.6850 $\pm$ 8.01%                                                  | 4.2116 $\pm$ 87.2%                                                  | 2.5925 $\pm$ 0.38%                                   | 12.1              | 2.3920 $\pm$ 0.80%                                       | 92.3                 | 2.66                                            | 1.160 $\pm$ 0.010                     |
| Arithmetic mean K/Ca (n = 7) |                                                                     |                                                                     |                                                      | 9.7 $\pm$ 4.0     | Arithmetic mean age (n = 10)                             |                      | 1.181 $\pm$ 0.020                               |                                       |
|                              |                                                                     |                                                                     |                                                      |                   | Weighted mean age (n = 10)                               |                      | 1.180 $\pm$ 0.006                               |                                       |
| $J = 2.689E-4 \pm 0.30\%$    |                                                                     |                                                                     |                                                      |                   |                                                          |                      |                                                 |                                       |
| 5657-01                      | 0.5479 $\pm$ 15.9%                                                  | 7.8015 $\pm$ 50.5%                                                  | 2.6141 $\pm$ 0.40%                                   | 6.6               | 2.4569 $\pm$ 1.13%                                       | 94.0                 | 1.92                                            | 1.192 $\pm$ 0.014                     |
| -02                          | 0.3456 $\pm$ 15.2%                                                  | 6.8290 $\pm$ 40.9%                                                  | 2.5734 $\pm$ 0.42%                                   | 7.5               | 2.4750 $\pm$ 0.76%                                       | 96.2                 | 2.83                                            | 1.201 $\pm$ 0.010                     |
| -03                          | 21.0617 $\pm$ 0.90%                                                 | 0.7546 $\pm$ 425%                                                   | 8.6641 $\pm$ 0.40%                                   | 67.6              | 2.4393 $\pm$ 2.92%                                       | 28.2                 | 7.99                                            | 1.183 $\pm$ 0.035                     |
| (-04                         | 0.2244 $\pm$ 46.2%                                                  | -                                                                   | 2.5617 $\pm$ 0.41%                                   | -                 | 2.4943 $\pm$ 1.29%                                       | 97.4                 | 1.46                                            | 1.210 $\pm$ 0.016)                    |
| -05                          | 0.1550 $\pm$ 53.6%                                                  | 0.0691 $\pm$ 4140%                                                  | 2.4754 $\pm$ 0.36%                                   | 740.7             | 2.4283 $\pm$ 1.07%                                       | 98.1                 | 2.79                                            | 1.178 $\pm$ 0.013                     |
| -06                          | 0.1907 $\pm$ 41.9%                                                  | 2.2382 $\pm$ 196%                                                   | 2.5067 $\pm$ 0.46%                                   | 22.8              | 2.4507 $\pm$ 1.07%                                       | 97.8                 | 1.65                                            | 1.189 $\pm$ 0.013                     |
| -07                          | 0.5978 $\pm$ 13.6%                                                  | 5.2494 $\pm$ 78.9%                                                  | 2.6318 $\pm$ 0.39%                                   | 9.7               | 2.4579 $\pm$ 1.07%                                       | 93.4                 | 1.89                                            | 1.192 $\pm$ 0.013                     |
| -08                          | 0.3198 $\pm$ 18.9%                                                  | 3.3590 $\pm$ 84.5%                                                  | 2.5426 $\pm$ 0.40%                                   | 15.2              | 2.4495 $\pm$ 0.84%                                       | 96.3                 | 2.63                                            | 1.188 $\pm$ 0.011                     |
| -09                          | 2.2249 $\pm$ 4.98%                                                  | -                                                                   | 3.0962 $\pm$ 0.42%                                   | -                 | 2.4322 $\pm$ 1.44%                                       | 78.7                 | 2.11                                            | 1.183 $\pm$ 0.017                     |
| -10                          | 2.0366 $\pm$ 3.83%                                                  | 0.8199 $\pm$ 361%                                                   | 3.0373 $\pm$ 0.43%                                   | 6.2               | 2.4347 $\pm$ 1.08%                                       | 80.2                 | 2.90                                            | 1.181 $\pm$ 0.013                     |
| Arithmetic mean K/Ca (n = 8) |                                                                     |                                                                     |                                                      | 109.5 $\pm$ 255.9 | Arithmetic mean age (n = 9)                              |                      | 1.188 $\pm$ 0.007                               |                                       |
|                              |                                                                     |                                                                     |                                                      |                   | Weighted mean age (n = 9)                                |                      | 1.189 $\pm$ 0.005                               |                                       |

 $\lambda = 5.543 \times 10^{-10} \text{ a}^{-1}$  Fluence monitor: 92-176 from Fish Canyon Tuff, reference age 28.1 Ma (Spell & McDougall, 2003) $(^{36}\text{Ar}/^{37}\text{Ar})_{\text{Ca}} = 2.57 (\pm 0.25) \times 10^{-4}$   $(^{39}\text{Ar}/^{37}\text{Ar})_{\text{Ca}} = 6.91 (\pm 0.94) \times 10^{-4}$   $(^{40}\text{Ar}/^{39}\text{Ar})_{\text{K}} = 8.0 (\pm 3.0) \times 10^{-4}$

$^{40}\text{Ar}^*$  - radiogenic  $^{40}\text{Ar}$        $^{39}\text{Ar}_K$  - K-derived  $^{39}\text{Ar}$

Results within parentheses have been excluded from the calculation of the mean

Quoted error for each age includes estimated error in J

Irradiated for one hour in CLICIT facility, Triga reactor, Oregon State University

Supplementary Table 2. Results of laser fusion  $^{40}\text{Ar}/^{39}\text{Ar}$  dating of single crystals of anorthoclase from trachyte in the Likayu West Volcano in The Barrier, Kenya, and from small pumice clasts in Tuff K, Member K, Shungura Formation, Errum, southern Ethiopia

| Run No.                                                                     | $^{36}\text{Ar}/^{39}\text{Ar}$<br>$\times 10^{-3} \pm \text{c.v.}$ | $^{37}\text{Ar}/^{39}\text{Ar}$<br>$\times 10^{-2} \pm \text{c.v.}$ | $^{40}\text{Ar}/^{39}\text{Ar}$<br>$\pm \text{c.v.}$ | K/Ca        | $^{40}\text{Ar}^*/^{39}\text{Ar}_K$<br>$\pm \text{c.v.}$ | $^{40}\text{Ar}^*$<br>%,<br>s.d. | $^{40}\text{Ar}$ mol<br>% | Calculated<br>$\times 10^{-14}$ Ma |
|-----------------------------------------------------------------------------|---------------------------------------------------------------------|---------------------------------------------------------------------|------------------------------------------------------|-------------|----------------------------------------------------------|----------------------------------|---------------------------|------------------------------------|
| <i>08-035 anorthoclase from trachyte, The Barrier; J = 2.689E-4 ± 0.30%</i> |                                                                     |                                                                     |                                                      |             |                                                          |                                  |                           |                                    |
| 5626-01                                                                     | 140.0 ± 1.12%                                                       | 6.765 ± 86.2%                                                       | 42.784 ± 0.40%                                       | 7.5         | 1.4083 ± 36.74%                                          | 3.3                              | 19.4                      | 0.683 ± 0.251                      |
| -02                                                                         | 89.77 ± 0.85%                                                       | 4.625 ± 46.9%                                                       | 27.783 ± 0.36%                                       | 11.0        | 1.2591 ± 21.62%                                          | 4.5                              | 33.8                      | 0.611 ± 0.132                      |
| -03                                                                         | 18.89 ± 1.07%                                                       | 1.835 ± 143%                                                        | 7.0988 ± 0.39%                                       | 27.8        | 1.5164 ± 4.53%                                           | 21.4                             | 6.69                      | 0.736 ± 0.033                      |
| -04                                                                         | 4.177 ± 4.02%                                                       | 6.256 ± 84.9%                                                       | 2.6809 ± 0.47%                                       | 8.2         | 1.4502 ± 3.51%                                           | 54.1                             | 1.27                      | 0.703 ± 0.025                      |
| -05                                                                         | 23.06 ± 0.94%                                                       | 16.034 ± 17.8%                                                      | 8.1361 ± 0.35%                                       | 3.2         | 1.3334 ± 5.72%                                           | 16.4                             | 7.01                      | 0.647 ± 0.037                      |
| -06                                                                         | 13.03 ± 1.61%                                                       | 6.236 ± 73.0%                                                       | 5.2459 ± 0.36%                                       | 8.2         | 1.3977 ± 4.78%                                           | 26.6                             | 3.02                      | 0.678 ± 0.033                      |
| -07                                                                         | 1.381 ± 6.22%                                                       | 1.886 ± 169%                                                        | 1.8508 ± 0.37%                                       | 27.0        | 1.4428 ± 1.82%                                           | 78.0                             | 1.64                      | 0.700 ± 0.013                      |
| -08                                                                         | 30.64 ± 1.24%                                                       | 3.550 ± 142%                                                        | 10.626 ± 0.38%                                       | 14.4        | 1.5726 ± 7.93%                                           | 14.8                             | 5.34                      | 0.763 ± 0.061                      |
| -09                                                                         | 0.404 ± 18.0%                                                       | 5.563 ± 60.8%                                                       | 1.5183 ± 0.45%                                       | 9.2         | 1.4019 ± 1.61%                                           | 92.3                             | 1.17                      | 0.680 ± 0.011                      |
| -10                                                                         | 23.72 ± 0.84%                                                       | 6.280 ± 52.6%                                                       | 8.6317 ± 0.35%                                       | 8.1         | 1.6248 ± 4.54%                                           | 18.8                             | 6.59                      | 0.788 ± 0.036                      |
| Arithmetic mean K/Ca (n = 10)                                               |                                                                     |                                                                     |                                                      | 12.5 ± 8.4  | Arithmetic mean age (n = 10)                             |                                  | 0.699 ± 0.053             |                                    |
|                                                                             |                                                                     |                                                                     |                                                      |             | Weighted mean age (n = 10)                               |                                  | 0.694 ± 0.009             |                                    |
| <i>08-024 anorthoclase, Tuff K; J = 2.690E-4 ± 0.26%</i>                    |                                                                     |                                                                     |                                                      |             |                                                          |                                  |                           |                                    |
| 5645-01                                                                     | 3.795 ± 2.93%                                                       | -                                                                   | 4.2331 ± 0.36%                                       | -           | 3.1106 ± 1.18%                                           | 73.5                             | 2.85                      | 1.509 ± 0.018                      |
| -02                                                                         | 0.2294 ± 40.2%                                                      | 8.268 ± 55.7%                                                       | 3.2478 ± 0.40%                                       | 6.2         | 3.1852 ± 0.34%                                           | 98.1                             | 1.92                      | 1.545 ± 0.015                      |
| -03                                                                         | 0.6729 ± 7.3%                                                       | 10.226 ± 22.5%                                                      | 3.3296 ± 0.37%                                       | 5.0         | 3.1372 ± 0.61%                                           | 94.2                             | 3.71                      | 1.522 ± 0.010                      |
| -04                                                                         | 0.5575 ± 20.5%                                                      | 0.8242 ± 715%                                                       | 3.3562 ± 0.47%                                       | 61.9        | 3.1909 ± 1.16%                                           | 95.1                             | 1.74                      | 1.548 ± 0.018                      |
| -05                                                                         | 0.2643 ± 30.8%                                                      | 6.359 ± 50.4%                                                       | 3.2035 ± 0.38%                                       | 8.0         | 3.1288 ± 0.86%                                           | 97.7                             | 2.40                      | 1.518 ± 0.014                      |
| -06                                                                         | 0.1696 ± 64.2%                                                      | 2.252 ± 224%                                                        | 3.2133 ± 0.45%                                       | 22.7        | 3.1632 ± 1.11%                                           | 98.4                             | 1.53                      | 1.534 ± 0.018                      |
| -07                                                                         | 0.3728 ± 15.8%                                                      | 1.496 ± 182%                                                        | 3.2063 ± 0.69%                                       | 34.1        | 3.0958 ± 0.68%                                           | 96.6                             | 3.38                      | 1.502 ± 0.011                      |
| -08                                                                         | 1.943 ± 7.3%                                                        | 3.420 ± 166%                                                        | 3.7195 ± 0.45%                                       | 14.9        | 3.1466 ± 1.43%                                           | 84.6                             | 1.83                      | 1.526 ± 0.022                      |
| -09                                                                         | 0.1525 ± 58.9%                                                      | 0.3411 ± 1257%                                                      | 3.2008 ± 0.38%                                       | 149.5       | 3.1546 ± 0.92%                                           | 98.6                             | 2.04                      | 1.530 ± 0.015                      |
| (-10                                                                        | 0.3269 ± 38.0%                                                      | 4.384 ± 120%                                                        | 3.3538 ± 0.49%                                       | 11.6        | 3.2591 ± 1.23%                                           | 97.2                             | 1.55                      | 1.581 ± 0.020)                     |
| Arithmetic mean K/Ca (n = 8)                                                |                                                                     |                                                                     |                                                      | 37.8 ± 49.0 | Arithmetic mean age (n = 9)                              |                                  | 1.526 ± 0.015             |                                    |
|                                                                             |                                                                     |                                                                     |                                                      |             | Weighted mean age (n = 9)                                |                                  | 1.522 ± 0.006             |                                    |

$\lambda = 5.543 \times 10^{-10} \text{ a}^{-1}$  Fluence monitor: 92-176 from Fish Canyon Tuff, reference age 28.1 Ma (Spell & McDougall, 2003)

$(^{36}\text{Ar}/^{37}\text{Ar})_{\text{Ca}} = 2.57 (\pm 0.25) \times 10^{-4}$   $(^{39}\text{Ar}/^{37}\text{Ar})_{\text{Ca}} = 6.91 (\pm 0.94) \times 10^{-4}$   $(^{40}\text{Ar}/^{39}\text{Ar})_{\text{K}} = 8.0 (\pm 3.0) \times 10^{-4}$

$^{40}\text{Ar}^*$  - radiogenic  $^{40}\text{Ar}$   $^{39}\text{Ar}_K$  - K-derived  $^{39}\text{Ar}$

Results within parentheses have been excluded from the calculation of the mean

Quoted error for each age includes estimated error in J

Irradiated for one hour in CLICIT facility, Triga reactor, Oregon State University

Supplementary Table 4. Results of laser fusion  $^{40}\text{Ar}/^{39}\text{Ar}$  dating of single crystals of anorthoclase from pumice clasts in Tuff G, Member G, Shungura Formation, and from pumice clasts in the Burgi Tuff, Burgi Member, Koobi Fora Formation, Kenya

| Run No.                                                                         | $^{36}\text{Ar}/^{39}\text{Ar}$<br>$\times 10^{-3} \pm \text{c.v.}$ | $^{37}\text{Ar}/^{39}\text{Ar}$<br>$\times 10^{-2} \pm \text{c.v.}$ | $^{40}\text{Ar}/^{39}\text{Ar}$<br>$\pm \text{c.v.}$ | K/Ca        | $^{40}\text{Ar}^*/^{39}\text{Ar}_K$<br>$\pm \text{c.v.}$ | $^{40}\text{Ar}^*$<br>%     | $^{40}\text{Ar}$ mol<br>% | Calculated<br>$\times 10^{-14}$ | Ma $\pm$ |
|---------------------------------------------------------------------------------|---------------------------------------------------------------------|---------------------------------------------------------------------|------------------------------------------------------|-------------|----------------------------------------------------------|-----------------------------|---------------------------|---------------------------------|----------|
| <i>08-029 anorthoclase from pumice clasts, Tuff G; J = 2.689E-4 ± 0.30%</i>     |                                                                     |                                                                     |                                                      |             |                                                          |                             |                           |                                 |          |
| 5614-01                                                                         | 2.2995 ± 3.7%                                                       | 0.4157 ± 304%                                                       | 5.3835 ± 0.36%                                       | 122.7       | 4.7090 ± 0.68%                                           | 87.4                        | 6.00                      | 2.283 ± 0.017                   |          |
| -02                                                                             | 0.5553 ± 18.9%                                                      | 0.0512 ± 486%                                                       | 4.8313 ± 0.37%                                       | 99.6        | 4.6663 ± 0.76%                                           | 96.6                        | 3.07                      | 2.262 ± 0.019                   |          |
| ( -04                                                                           | 242.135 ± 9.91%                                                     | 72.343 ± 298%                                                       | 99.3450 ± 8.4%                                       | 0.7         | 27.8628 ± 15.8%                                          | 28.0                        | 0.67                      | 13.466 ± 2.123)                 |          |
| -05                                                                             | 0.3164 ± 24.8%                                                      | 0.2949 ± 552%                                                       | 4.7485 ± 0.42%                                       | 173.0       | 4.6538 ± 0.66%                                           | 98.0                        | 4.52                      | 2.256 ± 0.016                   |          |
| -06                                                                             | 0.2598 ± 80.9%                                                      | 3.1006 ± 151%                                                       | 4.7527 ± 0.51%                                       | 16.5        | 4.6770 ± 1.42%                                           | 98.4                        | 1.50                      | 2.268 ± 0.033                   |          |
| -11                                                                             | 0.1654 ± 32.9%                                                      | 2.4581 ± 48.4%                                                      | 4.7067 ± 0.34%                                       | 20.8        | 4.6585 ± 0.49%                                           | 99.0                        | 5.56                      | 2.259 ± 0.013                   |          |
| -13                                                                             | 1.3280 ± 16.7%                                                      | 7.1837 ± 84.1%                                                      | 5.2407 ± 0.58%                                       | 7.1         | 4.8528 ± 1.47%                                           | 92.6                        | 1.45                      | 2.353 ± 0.035                   |          |
| -14                                                                             | 0.7678 ± 16.9%                                                      | 2.0226 ± 163%                                                       | 4.7990 ± 0.44%                                       | 25.2        | 4.5725 ± 0.95%                                           | 95.3                        | 2.59                      | 2.217 ± 0.022                   |          |
|                                                                                 |                                                                     | Arithmetic mean K/Ca (n = 7)                                        |                                                      | 66.4 ± 65.1 |                                                          | Arithmetic mean age (n = 7) |                           | 2.271 ± 0.041                   |          |
|                                                                                 |                                                                     |                                                                     |                                                      |             |                                                          | Weighted mean age (n = 7)   |                           | 2.262 ± 0.012                   |          |
| <i>08-032A anorthoclase from pumice clast, Burgi Tuff; J = 2.689E-4 ± 0.30%</i> |                                                                     |                                                                     |                                                      |             |                                                          |                             |                           |                                 |          |
| 5628-01                                                                         | 0.6590 ± 17.6%                                                      | 5.8169 ± 61.5%                                                      | 5.6259 ± 0.38%                                       | 8.8         | 5.4344 ± 0.74%                                           | 96.6                        | 3.32                      | 2.634 ± 0.021                   |          |
| ( -02                                                                           | 1.5467 ± 11.2%                                                      | 11.2365 ± 50.0%                                                     | 13.8556 ± 0.36%                                      | 4.5         | 13.4068 ± 0.53%                                          | 96.8                        | 5.20                      | 6.492 ± 0.040)                  |          |
| -03                                                                             | 1.0912 ± 23.5%                                                      | 10.1907 ± 96.0%                                                     | 5.7036 ± 0.69%                                       | 5.0         | 5.3879 ± 1.57%                                           | 94.5                        | 1.35                      | 2.612 ± 0.042                   |          |
| -04                                                                             | 1.4026 ± 13.4%                                                      | 3.3338 ± 177%                                                       | 5.8631 ± 0.45%                                       | 15.3        | 5.4500 ± 1.12%                                           | 93.0                        | 2.01                      | 2.642 ± 0.030                   |          |
| -05                                                                             | 1.3912 ± 19.3%                                                      | 7.8495 ± 130%                                                       | 5.7653 ± 0.59%                                       | 6.5         | 5.3591 ± 1.59%                                           | 93.0                        | 1.39                      | 2.598 ± 0.042                   |          |
| -06                                                                             | 0.9408 ± 22.5%                                                      | 18.8101 ± 44.6%                                                     | 5.7584 ± 0.54%                                       | 2.7         | 5.4942 ± 1.26%                                           | 95.4                        | 1.68                      | 2.663 ± 0.035                   |          |
| -07                                                                             | 1.5452 ± 14.7%                                                      | 4.1369 ± 189%                                                       | 5.9234 ± 0.58%                                       | 12.3        | 5.4692 ± 1.36%                                           | 92.3                        | 1.76                      | 2.651 ± 0.037                   |          |
| -08                                                                             | 1.4399 ± 19.3%                                                      | 2.3737 ± 418%                                                       | 5.9308 ± 0.53%                                       | 21.5        | 5.5059 ± 1.58%                                           | 92.8                        | 1.50                      | 2.669 ± 0.043                   |          |
| -09                                                                             | 0.0484 ± 670%                                                       | 2.3085 ± 414%                                                       | 5.6239 ± 0.63%                                       | 22.1        | 5.6100 ± 1.80%                                           | 99.8                        | 1.16                      | 2.719 ± 0.050                   |          |
| -10                                                                             | 0.8686 ± 32.1%                                                      | 6.0829 ± 258%                                                       | 5.7562 ± 0.60%                                       | 8.4         | 5.5030 ± 1.61%                                           | 95.6                        | 1.24                      | 2.668 ± 0.044                   |          |
|                                                                                 |                                                                     | Arithmetic mean K/Ca (n = 9)                                        |                                                      | 11.4 ± 7.0  |                                                          | Arithmetic mean age (n = 9) |                           | 2.651 ± 0.036                   |          |
|                                                                                 |                                                                     |                                                                     |                                                      |             |                                                          | Weighted mean age (n = 9)   |                           | 2.645 ± 0.014                   |          |
| <i>08-032B anorthoclase from pumice clast, Burgi Tuff; J = 2.689E-4 ± 0.30%</i> |                                                                     |                                                                     |                                                      |             |                                                          |                             |                           |                                 |          |
| (5629-01                                                                        | 1.7076 ± 7.2%                                                       | 11.4591 ± 25.4%                                                     | 6.6274 ± 0.35%                                       | 4.5         | 6.1309 ± 0.70%                                           | 92.5                        | 4.21                      | 2.972 ± 0.023)                  |          |
| -02                                                                             | 1.0281 ± 19.2%                                                      | 14.2553 ± 43.3%                                                     | 5.6722 ± 0.58%                                       | 3.6         | 5.3783 ± 1.23%                                           | 94.8                        | 1.91                      | 2.607 ± 0.033                   |          |
| -03                                                                             | 0.9097 ± 12.8%                                                      | 0.4674 ± 853%                                                       | 5.6136 ± 0.38%                                       | 109.2       | 5.3438 ± 0.75%                                           | 95.2                        | 3.28                      | 2.591 ± 0.021                   |          |
| -04                                                                             | 2.2050 ± 7.4%                                                       | 5.9645 ± 95.3%                                                      | 6.1870 ± 0.43%                                       | 8.6         | 5.5388 ± 0.99%                                           | 89.5                        | 2.51                      | 2.685 ± 0.028                   |          |
| -05                                                                             | 0.4612 ± 42.9%                                                      | 6.1629 ± 134%                                                       | 5.6871 ± 0.48%                                       | 8.3         | 5.5544 ± 1.15%                                           | 97.7                        | 1.78                      | 2.692 ± 0.032                   |          |
| -06                                                                             | 0.2711 ± 70.7%                                                      | 22.3403 ± 36.3%                                                     | 5.7729 ± 0.46%                                       | 2.3         | 5.7092 ± 1.09%                                           | 98.9                        | 1.77                      | 2.767 ± 0.031                   |          |
| -07                                                                             | 1.4155 ± 12.8%                                                      | 6.3984 ± 179%                                                       | 5.6942 ± 0.47%                                       | 8.0         | 5.2797 ± 1.13%                                           | 92.7                        | 1.94                      | 2.559 ± 0.030                   |          |
| -08                                                                             | 1.5299 ± 21.3%                                                      | 5.6580 ± 202%                                                       | 5.9392 ± 0.64%                                       | 9.0         | 5.4925 ± 1.85%                                           | 92.5                        | 1.26                      | 2.663 ± 0.050                   |          |
| -09                                                                             | 1.9386 ± 18.5%                                                      | 15.5583 ± 82.4%                                                     | 5.9717 ± 0.66%                                       | 3.3         | 5.0499 ± 2.07%                                           | 90.6                        | 1.11                      | 2.623 ± 0.055                   |          |
|                                                                                 |                                                                     | Arithmetic mean K/Ca (n = 8)                                        |                                                      | 19.0 ± 36.5 |                                                          | Arithmetic mean age (n = 8) |                           | 2.648 ± 0.067                   |          |
|                                                                                 |                                                                     |                                                                     |                                                      |             |                                                          | Weighted mean age (n = 8)   |                           | 2.640 ± 0.026                   |          |

$\lambda = 5.543 \times 10^{-10} \text{ a}^{-1}$  Fluence monitor: 92-176 from Fish Canyon Tuff, reference age 28.1 Ma (Spell & McDougall, 2003)

$(^{36}\text{Ar}/^{37}\text{Ar})_{\text{Ca}} = 2.57 (\pm 0.25) \times 10^{-4}$   $(^{39}\text{Ar}/^{37}\text{Ar})_{\text{Ca}} = 6.91 (\pm 0.94) \times 10^{-4}$   $(^{40}\text{Ar}/^{39}\text{Ar})_{\text{K}} = 8.0 (\pm 3.0) \times 10^{-4}$

$^{40}\text{Ar}^*$  - radiogenic  $^{40}\text{Ar}$   $^{39}\text{Ar}_K$  - K-derived  $^{39}\text{Ar}$

Results within parentheses have been excluded from the calculation of the mean

Quoted error for each age includes estimated error in J

Irradiated for one hour in CLICIT facility, Triga reactor, Oregon State University

Supplementary Table 4. Results of laser fusion  $^{40}\text{Ar}/^{39}\text{Ar}$  dating of single crystals of anorthoclase from pumice clasts in Tuff G, Member G, Shungura Formation, and from pumice clasts in the Burgi Tuff, Burgi Member, Koobi Fora Formation, Kenya

| Run No.                                                                         | $^{36}\text{Ar}/^{39}\text{Ar}$<br>$\times 10^{-3} \pm \text{c.v.}$ | $^{37}\text{Ar}/^{39}\text{Ar}$<br>$\times 10^{-2} \pm \text{c.v.}$ | $^{40}\text{Ar}/^{39}\text{Ar}$<br>$\pm \text{c.v.}$ | K/Ca        | $^{40}\text{Ar}^*/^{39}\text{Ar}_K$<br>$\pm \text{c.v.}$ | $^{40}\text{Ar}^*$<br>%     | $^{40}\text{Ar}$ mol<br>% | Calculated<br>$\times 10^{-14}$ | Ma $\pm$ |
|---------------------------------------------------------------------------------|---------------------------------------------------------------------|---------------------------------------------------------------------|------------------------------------------------------|-------------|----------------------------------------------------------|-----------------------------|---------------------------|---------------------------------|----------|
| <i>08-029 anorthoclase from pumice clasts, Tuff G; J = 2.689E-4 ± 0.30%</i>     |                                                                     |                                                                     |                                                      |             |                                                          |                             |                           |                                 |          |
| 5614-01                                                                         | 2.2995 ± 3.7%                                                       | 0.4157 ± 304%                                                       | 5.3835 ± 0.36%                                       | 122.7       | 4.7090 ± 0.68%                                           | 87.4                        | 6.00                      | 2.283 ± 0.017                   |          |
| -02                                                                             | 0.5553 ± 18.9%                                                      | 0.0512 ± 486%                                                       | 4.8313 ± 0.37%                                       | 99.6        | 4.6663 ± 0.76%                                           | 96.6                        | 3.07                      | 2.262 ± 0.019                   |          |
| ( -04                                                                           | 242.135 ± 9.91%                                                     | 72.343 ± 298%                                                       | 99.3450 ± 8.4%                                       | 0.7         | 27.8628 ± 15.8%                                          | 28.0                        | 0.67                      | 13.466 ± 2.123)                 |          |
| -05                                                                             | 0.3164 ± 24.8%                                                      | 0.2949 ± 552%                                                       | 4.7485 ± 0.42%                                       | 173.0       | 4.6538 ± 0.66%                                           | 98.0                        | 4.52                      | 2.256 ± 0.016                   |          |
| -06                                                                             | 0.2598 ± 80.9%                                                      | 3.1006 ± 151%                                                       | 4.7527 ± 0.51%                                       | 16.5        | 4.6770 ± 1.42%                                           | 98.4                        | 1.50                      | 2.268 ± 0.033                   |          |
| -11                                                                             | 0.1654 ± 32.9%                                                      | 2.4581 ± 48.4%                                                      | 4.7067 ± 0.34%                                       | 20.8        | 4.6585 ± 0.49%                                           | 99.0                        | 5.56                      | 2.259 ± 0.013                   |          |
| -13                                                                             | 1.3280 ± 16.7%                                                      | 7.1837 ± 84.1%                                                      | 5.2407 ± 0.58%                                       | 7.1         | 4.8528 ± 1.47%                                           | 92.6                        | 1.45                      | 2.353 ± 0.035                   |          |
| -14                                                                             | 0.7678 ± 16.9%                                                      | 2.0226 ± 163%                                                       | 4.7990 ± 0.44%                                       | 25.2        | 4.5725 ± 0.95%                                           | 95.3                        | 2.59                      | 2.217 ± 0.022                   |          |
|                                                                                 |                                                                     | Arithmetic mean K/Ca (n = 7)                                        |                                                      | 66.4 ± 65.1 |                                                          | Arithmetic mean age (n = 7) |                           | 2.271 ± 0.041                   |          |
|                                                                                 |                                                                     |                                                                     |                                                      |             |                                                          | Weighted mean age (n = 7)   |                           | 2.262 ± 0.012                   |          |
| <i>08-032A anorthoclase from pumice clast, Burgi Tuff; J = 2.689E-4 ± 0.30%</i> |                                                                     |                                                                     |                                                      |             |                                                          |                             |                           |                                 |          |
| 5628-01                                                                         | 0.6590 ± 17.6%                                                      | 5.8169 ± 61.5%                                                      | 5.6259 ± 0.38%                                       | 8.8         | 5.4344 ± 0.74%                                           | 96.6                        | 3.32                      | 2.634 ± 0.021                   |          |
| ( -02                                                                           | 1.5467 ± 11.2%                                                      | 11.2365 ± 50.0%                                                     | 13.8556 ± 0.36%                                      | 4.5         | 13.4068 ± 0.53%                                          | 96.8                        | 5.20                      | 6.492 ± 0.040)                  |          |
| -03                                                                             | 1.0912 ± 23.5%                                                      | 10.1907 ± 96.0%                                                     | 5.7036 ± 0.69%                                       | 5.0         | 5.3879 ± 1.57%                                           | 94.5                        | 1.35                      | 2.612 ± 0.042                   |          |
| -04                                                                             | 1.4026 ± 13.4%                                                      | 3.3338 ± 177%                                                       | 5.8631 ± 0.45%                                       | 15.3        | 5.4500 ± 1.12%                                           | 93.0                        | 2.01                      | 2.642 ± 0.030                   |          |
| -05                                                                             | 1.3912 ± 19.3%                                                      | 7.8495 ± 130%                                                       | 5.7653 ± 0.59%                                       | 6.5         | 5.3591 ± 1.59%                                           | 93.0                        | 1.39                      | 2.598 ± 0.042                   |          |
| -06                                                                             | 0.9408 ± 22.5%                                                      | 18.8101 ± 44.6%                                                     | 5.7584 ± 0.54%                                       | 2.7         | 5.4942 ± 1.26%                                           | 95.4                        | 1.68                      | 2.663 ± 0.035                   |          |
| -07                                                                             | 1.5452 ± 14.7%                                                      | 4.1369 ± 189%                                                       | 5.9234 ± 0.58%                                       | 12.3        | 5.4692 ± 1.36%                                           | 92.3                        | 1.76                      | 2.651 ± 0.037                   |          |
| -08                                                                             | 1.4399 ± 19.3%                                                      | 2.3737 ± 418%                                                       | 5.9308 ± 0.53%                                       | 21.5        | 5.5059 ± 1.58%                                           | 92.8                        | 1.50                      | 2.669 ± 0.043                   |          |
| -09                                                                             | 0.0484 ± 670%                                                       | 2.3085 ± 414%                                                       | 5.6239 ± 0.63%                                       | 22.1        | 5.6100 ± 1.80%                                           | 99.8                        | 1.16                      | 2.719 ± 0.050                   |          |
| -10                                                                             | 0.8686 ± 32.1%                                                      | 6.0829 ± 258%                                                       | 5.7562 ± 0.60%                                       | 8.4         | 5.5030 ± 1.61%                                           | 95.6                        | 1.24                      | 2.668 ± 0.044                   |          |
|                                                                                 |                                                                     | Arithmetic mean K/Ca (n = 9)                                        |                                                      | 11.4 ± 7.0  |                                                          | Arithmetic mean age (n = 9) |                           | 2.651 ± 0.036                   |          |
|                                                                                 |                                                                     |                                                                     |                                                      |             |                                                          | Weighted mean age (n = 9)   |                           | 2.645 ± 0.014                   |          |
| <i>08-032B anorthoclase from pumice clast, Burgi Tuff; J = 2.689E-4 ± 0.30%</i> |                                                                     |                                                                     |                                                      |             |                                                          |                             |                           |                                 |          |
| (5629-01                                                                        | 1.7076 ± 7.2%                                                       | 11.4591 ± 25.4%                                                     | 6.6274 ± 0.35%                                       | 4.5         | 6.1309 ± 0.70%                                           | 92.5                        | 4.21                      | 2.972 ± 0.023)                  |          |
| -02                                                                             | 1.0281 ± 19.2%                                                      | 14.2553 ± 43.3%                                                     | 5.6722 ± 0.58%                                       | 3.6         | 5.3783 ± 1.23%                                           | 94.8                        | 1.91                      | 2.607 ± 0.033                   |          |
| -03                                                                             | 0.9097 ± 12.8%                                                      | 0.4674 ± 853%                                                       | 5.6136 ± 0.38%                                       | 109.2       | 5.3438 ± 0.75%                                           | 95.2                        | 3.28                      | 2.591 ± 0.021                   |          |
| -04                                                                             | 2.2050 ± 7.4%                                                       | 5.9645 ± 95.3%                                                      | 6.1870 ± 0.43%                                       | 8.6         | 5.5388 ± 0.99%                                           | 89.5                        | 2.51                      | 2.685 ± 0.028                   |          |
| -05                                                                             | 0.4612 ± 42.9%                                                      | 6.1629 ± 134%                                                       | 5.6871 ± 0.48%                                       | 8.3         | 5.5544 ± 1.15%                                           | 97.7                        | 1.78                      | 2.692 ± 0.032                   |          |
| -06                                                                             | 0.2711 ± 70.7%                                                      | 22.3403 ± 36.3%                                                     | 5.7729 ± 0.46%                                       | 2.3         | 5.7092 ± 1.09%                                           | 98.9                        | 1.77                      | 2.767 ± 0.031                   |          |
| -07                                                                             | 1.4155 ± 12.8%                                                      | 6.3984 ± 179%                                                       | 5.6942 ± 0.47%                                       | 8.0         | 5.2797 ± 1.13%                                           | 92.7                        | 1.94                      | 2.559 ± 0.030                   |          |
| -08                                                                             | 1.5299 ± 21.3%                                                      | 5.6580 ± 202%                                                       | 5.9392 ± 0.64%                                       | 9.0         | 5.4925 ± 1.85%                                           | 92.5                        | 1.26                      | 2.663 ± 0.050                   |          |
| -09                                                                             | 1.9386 ± 18.5%                                                      | 15.5583 ± 82.4%                                                     | 5.9717 ± 0.66%                                       | 3.3         | 5.0499 ± 2.07%                                           | 90.6                        | 1.11                      | 2.623 ± 0.055                   |          |
|                                                                                 |                                                                     | Arithmetic mean K/Ca (n = 8)                                        |                                                      | 19.0 ± 36.5 |                                                          | Arithmetic mean age (n = 8) |                           | 2.648 ± 0.067                   |          |
|                                                                                 |                                                                     |                                                                     |                                                      |             |                                                          | Weighted mean age (n = 8)   |                           | 2.640 ± 0.026                   |          |

$\lambda = 5.543 \times 10^{-10} \text{ a}^{-1}$  Fluence monitor: 92-176 from Fish Canyon Tuff, reference age 28.1 Ma (Spell & McDougall, 2003)

$(^{36}\text{Ar}/^{37}\text{Ar})_{\text{Ca}} = 2.57 (\pm 0.25) \times 10^{-4}$   $(^{39}\text{Ar}/^{37}\text{Ar})_{\text{Ca}} = 6.91 (\pm 0.94) \times 10^{-4}$   $(^{40}\text{Ar}/^{39}\text{Ar})_{\text{K}} = 8.0 (\pm 3.0) \times 10^{-4}$

$^{40}\text{Ar}^*$  - radiogenic  $^{40}\text{Ar}$   $^{39}\text{Ar}_K$  - K-derived  $^{39}\text{Ar}$

Results within parentheses have been excluded from the calculation of the mean

Quoted error for each age includes estimated error in J

Irradiated for one hour in CLICIT facility, Triga reactor, Oregon State University

Supplementary Table 5. Results of laser fusion  $^{40}\text{Ar}/^{39}\text{Ar}$  dating of single crystals of plagioclase from pumice clasts in Tuff C-gamma, Member C, Shungura Formation, southern Ethiopia

| Run No.                                                                            | $^{36}\text{Ar}/^{39}\text{Ar}$<br>$\times 10^{-2} \pm \text{c.v.}$ | $^{37}\text{Ar}/^{39}\text{Ar}$<br>$\pm \text{c.v.}$ | $^{40}\text{Ar}/^{39}\text{Ar}$<br>$\pm \text{c.v.}$ | K/Ca                 | $^{40}\text{Ar}^*/^{39}\text{Ar}_K$<br>$\pm \text{c.v.}$   | $^{40}\text{Ar}^*$ %<br>mol $\times 10^{-14}$ | $^{40}\text{Ar}$ | Calculated Age<br>Ma $\pm 1 \text{ s.d.}$ |
|------------------------------------------------------------------------------------|---------------------------------------------------------------------|------------------------------------------------------|------------------------------------------------------|----------------------|------------------------------------------------------------|-----------------------------------------------|------------------|-------------------------------------------|
| <i>08-026A plagioclase from pumice clasts; J = 2.690E-4 <math>\pm</math> 0.26%</i> |                                                                     |                                                      |                                                      |                      |                                                            |                                               |                  |                                           |
| 5648-01                                                                            | 7.9165 $\pm$ 1.78%                                                  | 4.1104 $\pm$ 4.43%                                   | 29.2341 $\pm$ 0.78%                                  | 0.124                | 6.1690 $\pm$ 6.85%                                         | 21.0                                          | 2.97             | 2.991 $\pm$ 0.205                         |
| -02                                                                                | 1.1943 $\pm$ 8.45%                                                  | 2.2800 $\pm$ 9.74%                                   | 8.4682 $\pm$ 0.93%                                   | 0.224                | 5.1189 $\pm$ 5.93%                                         | 60.4                                          | 0.61             | 2.483 $\pm$ 0.147                         |
| -03                                                                                | 1.6472 $\pm$ 5.72%                                                  | 3.0372 $\pm$ 5.92%                                   | 10.9133 $\pm$ 9.80%                                  | 0.168                | 6.2881 $\pm$ 4.57%                                         | 57.5                                          | 0.96             | 3.049 $\pm$ 0.140                         |
| -04                                                                                | 21.5719 $\pm$ 1.77%                                                 | 3.1367 $\pm$ 8.70%                                   | 70.2424 $\pm$ 1.30%                                  | 0.163                | 6.7482 $\pm$ 13.5%                                         | 9.6                                           | 4.31             | 3.272 $\pm$ 0.440                         |
| -05                                                                                | 2.6231 $\pm$ 4.67%                                                  | 2.3388 $\pm$ 9.95%                                   | 14.0886 $\pm$ 1.21%                                  | 0.220                | 6.5246 $\pm$ 5.64%                                         | 46.2                                          | 0.98             | 3.164 $\pm$ 0.178                         |
| -06                                                                                | 7.9175 $\pm$ 2.14%                                                  | 2.5351 $\pm$ 8.65%                                   | 30.0720 $\pm$ 1.01%                                  | 0.210                | 6.8790 $\pm$ 7.09%                                         | 22.8                                          | 2.13             | 3.335 $\pm$ 0.236                         |
| -07                                                                                | 6.7556 $\pm$ 1.74%                                                  | 3.7097 $\pm$ 3.89%                                   | 29.9846 $\pm$ 0.80%                                  | 0.138                | 5.3165 $\pm$ 6.62%                                         | 21.2                                          | 2.76             | 2.578 $\pm$ 0.171                         |
| -08                                                                                | 3.2187 $\pm$ 3.65%                                                  | 2.7777 $\pm$ 6.97%                                   | 15.4753 $\pm$ 0.98%                                  | 0.184                | 6.1858 $\pm$ 5.69%                                         | 39.9                                          | 1.30             | 2.999 $\pm$ 0.171                         |
| -09                                                                                | 3.8549 $\pm$ 6.56%                                                  | 3.7116 $\pm$ 11.3%                                   | 18.0121 $\pm$ 1.72%                                  | 0.138                | 6.9189 $\pm$ 10.7%                                         | 38.3                                          | 0.60             | 3.355 $\pm$ 0.358                         |
| -10                                                                                | 3.8627 $\pm$ 4.17%                                                  | 3.1621 $\pm$ 9.81%                                   | 18.7182 $\pm$ 1.27%                                  | 0.161                | 7.5588 $\pm$ 6.29%                                         | 40.3                                          | 0.98             | 3.665 $\pm$ 0.231                         |
|                                                                                    |                                                                     | Arithmetic mean K/Ca (n = 10)                        |                                                      | 0.117 $\pm$<br>0.036 | Arithmetic mean age (n = 10)<br>Weighted mean age (n = 10) |                                               |                  | 3.089 $\pm$ 0.357<br>2.969 $\pm$ 0.113    |
| <i>08-026B plagioclase from pumice clasts; J = 2.690E-4 <math>\pm</math> 0.26%</i> |                                                                     |                                                      |                                                      |                      |                                                            |                                               |                  |                                           |
| 5649-01                                                                            | 32.2424 $\pm$ 1.33%                                                 | 3.0854 $\pm$ 5.68%                                   | 100.97 $\pm$ 0.95%                                   | 0.165                | 5.9370 $\pm$ 19.6%                                         | 5.9                                           | 8.98             | 2.879 $\pm$ 0.563                         |
| ( -02                                                                              | 283.406 $\pm$ 2.05%                                                 | 15.0558 $\pm$ 2.85%                                  | 870.61 $\pm$ 2.00%                                   | 0.044                | 34.6352 $\pm$ 20.2%                                        | 3.9                                           | 46.5             | 16.731 $\pm$ 3.369)                       |
| ( -03                                                                              | 26.9351 $\pm$ 1.57%                                                 | 2.3123 $\pm$ 11.8%                                   | 90.2434 $\pm$ 1.20%                                  | 0.221                | 10.8404 $\pm$ 9.37%                                        | 12.0                                          | 6.01             | 5.253 $\pm$ 0.492)                        |
| -04                                                                                | 9.8247 $\pm$ 1.79%                                                  | 2.5793 $\pm$ 7.03%                                   | 34.2194 $\pm$ 0.96%                                  | 0.198                | 5.4630 $\pm$ 9.20%                                         | 15.9                                          | 2.72             | 2.649 $\pm$ 0.244                         |
| -05                                                                                | 17.6960 $\pm$ 1.57%                                                 | 4.2661 $\pm$ 4.55%                                   | 55.9505 $\pm$ 0.95%                                  | 0.120                | 3.9915 $\pm$ 19.1%                                         | 7.1                                           | 4.59             | 1.936 $\pm$ 0.370                         |
| -06                                                                                | 1.8242 $\pm$ 8.85%                                                  | 3.0111 $\pm$ 10.4%                                   | 10.2016 $\pm$ 1.56%                                  | 0.169                | 5.049 $\pm$ 9.51%                                          | 49.4                                          | 0.44             | 2.449 $\pm$ 0.233                         |
| -07                                                                                | 7.3050 $\pm$ 3.10%                                                  | 4.2343 $\pm$ 7.53%                                   | 27.7350 $\pm$ 1.47%                                  | 0.121                | 6.4878 $\pm$ 9.75%                                         | 23.3                                          | 1.33             | 3.146 $\pm$ 0.307                         |
| -08                                                                                | 8.5050 $\pm$ 2.18%                                                  | 2.9082 $\pm$ 8.45%                                   | 32.3707 $\pm$ 1.19%                                  | 0.175                | 7.4728 $\pm$ 6.89%                                         | 23.0                                          | 1.94             | 3.623 $\pm$ 0.249                         |
| -09                                                                                | 5.7448 $\pm$ 3.98%                                                  | 3.6453 $\pm$ 7.07%                                   | 23.1003 $\pm$ 1.39%                                  | 0.140                | 6.4163 $\pm$ 10.3%                                         | 27.7                                          | 1.06             | 3.111 $\pm$ 0.319                         |
| -10                                                                                | 6.2777 $\pm$ 2.81%                                                  | 2.7219 $\pm$ 8.18%                                   | 25.5900 $\pm$ 1.01%                                  | 0.187                | 7.2581 $\pm$ 7.14%                                         | 28.3                                          | 1.74             | 3.519 $\pm$ 0.251                         |
|                                                                                    |                                                                     | Arithmetic mean K/Ca (n = 8)                         |                                                      | 0.159 $\pm$<br>0.029 | Arithmetic mean age (n = 8)<br>Weighted mean age (n = 8)   |                                               |                  | 2.914 $\pm$ 0.561<br>2.966 $\pm$ 0.197    |

$\lambda = 5.543 \times 10^{-10} \text{ a}^{-1}$  Fluence monitor: 92-176 from Fish Canyon Tuff, reference age 28.1 Ma (Spell & McDougall, 2003)

$(^{36}\text{Ar}/^{37}\text{Ar})_{\text{Ca}} = 2.57 (\pm 0.25) \times 10^{-4}$   $(^{39}\text{Ar}/^{37}\text{Ar})_{\text{Ca}} = 6.91 (\pm 0.94) \times 10^{-4}$   $(^{40}\text{Ar}/^{39}\text{Ar})_{\text{K}} = 8.0 (\pm 3.0) \times 10^{-4}$

$^{40}\text{Ar}^*$  - radiogenic  $^{40}\text{Ar}$   $^{39}\text{Ar}_K$  - K-derived  $^{39}\text{Ar}$

Results within parentheses have been excluded from the calculation of the mean

Quoted error for each age includes estimated error in J

Irradiated for one hour in CLICIT facility, Triga reactor, Oregon State University



Supplementary Table 6. Results of laser fusion  $^{40}\text{Ar}/^{39}\text{Ar}$  dating of single crystals of anorthoclase from pumice clasts in Tuff B-delta, Member B, Shungura Formation, Ethiopia

| Run No.                                                                            | $^{36}\text{Ar}/^{39}\text{Ar}$<br>x $10^{-3} \pm$ c.v. | $^{37}\text{Ar}/^{39}\text{Ar}$<br>x $10^{-2} \pm$ c.v. | $^{40}\text{Ar}/^{39}\text{Ar}$<br>$\pm$ c.v. | K/Ca             | $^{40}\text{Ar}^*/^{39}\text{Ar}_K$<br>$\pm$ c.v. | % $^{40}\text{Ar}^*$         | $^{40}\text{Ar}$ mol<br>ge<br>x $10^{-14}$ | Calculated<br>Ma $\pm$ 1 s.d. |
|------------------------------------------------------------------------------------|---------------------------------------------------------|---------------------------------------------------------|-----------------------------------------------|------------------|---------------------------------------------------|------------------------------|--------------------------------------------|-------------------------------|
| <i>08-020A anorthoclase from pumice clast; J = 2.690E-4 <math>\pm</math> 0.26%</i> |                                                         |                                                         |                                               |                  |                                                   |                              |                                            |                               |
| 5652-01                                                                            | 0.7968 $\pm$ 20.0%                                      | 3.3292 $\pm$ 126%                                       | 7.3611 $\pm$ 0.33%                            | 15.3             | 7.1269 $\pm$ 0.74%                                | 96.8                         | 5.15                                       | 3.455 $\pm$ 0.027             |
| -02                                                                                | 2.0242 $\pm$ 3.9%                                       | 0.3456 $\pm$ 794%                                       | 7.6270 $\pm$ 0.35%                            | 147.7            | 7.0275 $\pm$ 0.51%                                | 92.1                         | 7.85                                       | 3.407 $\pm$ 0.019             |
| ( -04                                                                              | 651.14 $\pm$ 0.59%                                      | -                                                       | 211.409 $\pm$ 0.44%                           | -                | 18.991 $\pm$ 8.28%                                | 9.0                          | 178                                        | 9.193 $\pm$ 0.760)            |
| ( -05                                                                              | 7.9698 $\pm$ 2.9%                                       | 5.6401 $\pm$ 120%                                       | 9.5879 $\pm$ 0.40%                            | 9.0              | 7.2361 $\pm$ 1.08%                                | 75.5                         | 4.36                                       | 3.508 $\pm$ 0.039)            |
| -06                                                                                | 0.7301 $\pm$ 19.6%                                      | 0.1223 $\pm$ 5355%                                      | 7.2644 $\pm$ 0.41%                            | 416.7            | 7.0474 $\pm$ 0.73%                                | 97.0                         | 3.42                                       | 3.417 $\pm$ 0.026             |
| -07                                                                                | 1.6309 $\pm$ 7.6%                                       | 5.2032 $\pm$ 83.4%                                      | 7.4848 $\pm$ 0.33%                            | 9.8              | 7.0055 $\pm$ 0.63%                                | 93.6                         | 4.27                                       | 3.397 $\pm$ 0.023             |
| 08                                                                                 | 0.7859 $\pm$ 19.5%                                      | 7.2831 $\pm$ 109%                                       | 7.2482 $\pm$ 0.42%                            | 7.1              | 7.0206 $\pm$ 0.77%                                | 96.9                         | 2.99                                       | 3.404 $\pm$ 0.028             |
| -09                                                                                | 1.0662 $\pm$ 15.6%                                      | 4.2747 $\pm$ 156%                                       | 7.3835 $\pm$ 0.38%                            | 11.9             | 7.0704 $\pm$ 0.80%                                | 95.8                         | 2.87                                       | 3.428 $\pm$ 0.029             |
| -10                                                                                | 0.3133 $\pm$ 32.8%                                      | 7.1831 $\pm$ 55.8%                                      | 7.1297 $\pm$ 0.40%                            | 7.1              | 7.0416 $\pm$ 0.59%                                | 98.8                         | 4.30                                       | 3.414 $\pm$ 0.022             |
| ( -11                                                                              | 359.97 $\pm$ 0.47%                                      | 3.4685 $\pm$ 63.5%                                      | 120.89 $\pm$ 0.34%                            | 14.7             | 14.5213 $\pm$ 5.56%                               | 12.0                         | 187                                        | 7.034 $\pm$ 0.391)            |
| ( -12                                                                              | 30.0063 $\pm$ 1.11%                                     | 12.789 $\pm$ 66.3%                                      | 16.731 $\pm$ 0.40%                            | 4.0              | 7.8725 $\pm$ 1.54%                                | 47.1                         | 6.66                                       | 3.816 $\pm$ 0.059)            |
| -13                                                                                | 0.9217 $\pm$ 25.7%                                      | 19.893 $\pm$ 87.5%                                      | 7.3131 $\pm$ 0.57%                            | 2.6              | 7.0552 $\pm$ 1.16%                                | 96.5                         | 2.13                                       | 3.421 $\pm$ 0.041             |
| -14                                                                                | 0.9361 $\pm$ 22.9%                                      | 36.261 $\pm$ 24.9%                                      | 7.3563 $\pm$ 0.54%                            | 1.4              | 7.1076 $\pm$ 1.05%                                | 96.6                         | 2.21                                       | 3.446 $\pm$ 0.037             |
| ( -15                                                                              | 0.1630 $\pm$ 101%                                       | 5.8057 $\pm$ 174%                                       | 7.2645 $\pm$ 0.45%                            | 8.8              | 7.2197 $\pm$ 0.81%                                | 99.4                         | 2.52                                       | 3.500 $\pm$ 0.030)            |
| ( -16                                                                              | 0.8389 $\pm$ 26.7%                                      | 1.0329 $\pm$ 1069%                                      | 8.4856 $\pm$ 0.50%                            | 49.4             | 8.2375 $\pm$ 0.95%                                | 97.1                         | 2.26                                       | 3.993 $\pm$ 0.039)            |
| 5661-01                                                                            | 1.9998 $\pm$ 4.22%                                      | 15.129 $\pm$ 20.1%                                      | 7.6936 $\pm$ 0.38%                            | 3.4              | 7.1133 $\pm$ 0.53%                                | 92.5                         | 7.29                                       | 3.449 $\pm$ 0.020             |
| -02                                                                                | 0.7173 $\pm$ 10.2%                                      | 10.506 $\pm$ 34.3%                                      | 7.2392 $\pm$ 0.39%                            | 4.9              | 7.0345 $\pm$ 0.51%                                | 97.2                         | 6.43                                       | 3.411 $\pm$ 0.019             |
| -03                                                                                | 1.8378 $\pm$ 4.92%                                      | 1.1918 $\pm$ 332%                                       | 7.6863 $\pm$ 0.34%                            | 42.8             | 7.1430 $\pm$ 0.52%                                | 92.9                         | 5.54                                       | 3.463 $\pm$ 0.020             |
| -04                                                                                | 0.7291 $\pm$ 11.1%                                      | 1.3774 $\pm$ 26.9%                                      | 7.2985 $\pm$ 0.39%                            | 37.0             | 7.0825 $\pm$ 0.52%                                | 97.0                         | 6.26                                       | 3.434 $\pm$ 0.020             |
|                                                                                    |                                                         | Arithmetic mean K/Ca (n = 13)                           |                                               | 54.4 $\pm$ 115.7 |                                                   | Arithmetic mean age (n = 13) |                                            | 3.427 $\pm$ 0.021             |
|                                                                                    |                                                         |                                                         |                                               |                  |                                                   | Weighted mean age (n = 13)   |                                            | 3.426 $\pm$ 0.011             |
| <i>08-020B anorthoclase from pumice clast; J = 2.690E-4 <math>\pm</math> 0.26%</i> |                                                         |                                                         |                                               |                  |                                                   |                              |                                            |                               |
| 5653-01                                                                            | 0.3115 $\pm$ 18.9%                                      | 2.9837 $\pm$ 100%                                       | 7.0498 $\pm$ 0.38%                            | 17.1             | 6.9588 $\pm$ 0.46%                                | 98.7                         | 6.86                                       | 3.374 $\pm$ 0.018             |
| -02                                                                                | 1.1482 $\pm$ 12.8%                                      | 11.9491 $\pm$ 51.0%                                     | 7.4096 $\pm$ 0.37%                            | 4.3              | 7.0786 $\pm$ 0.72%                                | 95.5                         | 4.04                                       | 3.432 $\pm$ 0.026             |
| -03                                                                                | 2.0981 $\pm$ 4.97%                                      | 9.8431 $\pm$ 60.2%                                      | 7.5644 $\pm$ 0.36%                            | 5.2              | 6.9509 $\pm$ 0.59%                                | 91.9                         | 4.54                                       | 3.370 $\pm$ 0.022             |
| -04                                                                                | 0.5783 $\pm$ 13.8%                                      | 2.7576 $\pm$ 119%                                       | 7.2048 $\pm$ 0.34%                            | 18.5             | 7.0349 $\pm$ 0.48%                                | 97.6                         | 5.45                                       | 3.411 $\pm$ 0.019             |
| -05                                                                                | 0.5710 $\pm$ 14.1%                                      | 13.5638 $\pm$ 24.2%                                     | 7.1650 $\pm$ 0.36%                            | 3.8              | 7.0058 $\pm$ 0.50%                                | 97.8                         | 5.88                                       | 3.397 $\pm$ 0.019             |
| -06                                                                                | 0.7366 $\pm$ 12.4%                                      | 7.8281 $\pm$ 54.1%                                      | 7.1889 $\pm$ 0.37%                            | 6.5              | 6.9761 $\pm$ 0.54%                                | 97.0                         | 4.91                                       | 3.382 $\pm$ 0.020             |
| -07                                                                                | 4.0660 $\pm$ 2.29%                                      | 6.8141 $\pm$ 48.6%                                      | 8.1956 $\pm$ 0.37%                            | 7.5              | 6.9981 $\pm$ 0.59%                                | 85.4                         | 7.73                                       | 3.393 $\pm$ 0.022             |
| -08                                                                                | 11.1212 $\pm$ 1.75%                                     | -                                                       | 10.3468 $\pm$ 0.35%                           | -                | 7.0597 $\pm$ 0.99%                                | 68.2                         | 6.01                                       | 3.423 $\pm$ 0.035             |
| -09                                                                                | 1.3686 $\pm$ 7.94%                                      | 14.3756 $\pm$ 30.8%                                     | 7.3225 $\pm$ 0.35%                            | 3.6              | 6.9282 $\pm$ 0.59%                                | 94.6                         | 4.72                                       | 3.359 $\pm$ 0.022             |
| -10                                                                                | 0.8408 $\pm$ 13.2%                                      | -                                                       | 7.1967 $\pm$ 0.34%                            | -                | 6.9472 $\pm$ 0.59%                                | 96.5                         | 4.26                                       | 3.368 $\pm$ 0.022             |
|                                                                                    |                                                         | Arithmetic mean K/Ca (n = 8)                            |                                               | 8.3 $\pm$ 6.0    |                                                   | Arithmetic mean age (n = 10) |                                            | 3.391 $\pm$ 0.025             |
|                                                                                    |                                                         |                                                         |                                               |                  |                                                   | Weighted mean age (n = 10)   |                                            | 3.387 $\pm$ 0.011             |
| <i>08-034A anorthoclase from pumice clast; J = 2.689E-4 <math>\pm</math> 0.30%</i> |                                                         |                                                         |                                               |                  |                                                   |                              |                                            |                               |
| 5630-01                                                                            | 1.4294 $\pm$ 7.19%                                      | 5.2286 $\pm$ 43.3%                                      | 7.3507 $\pm$ 0.35%                            | 9.8              | 6.9313 $\pm$ 0.57%                                | 94.3                         | 5.21                                       | 3.359 $\pm$ 0.022             |
| -02                                                                                | 1.2364 $\pm$ 30.3%                                      | 6.9641 $\pm$ 112%                                       | 7.4205 $\pm$ 0.65%                            | 7.3              | 7.0595 $\pm$ 1.69%                                | 95.1                         | 1.30                                       | 3.421 $\pm$ 0.059             |
| -03                                                                                | 0.7078 $\pm$ 11.2%                                      | 4.5730 $\pm$ 36.4%                                      | 7.2769 $\pm$ 0.39%                            | 11.2             | 7.0703 $\pm$ 0.51%                                | 97.2                         | 6.61                                       | 3.427 $\pm$ 0.020             |
| -04                                                                                | 0.7300 $\pm$ 41.3%                                      | 0.5273 $\pm$ 1398%                                      | 7.3752 $\pm$ 0.53%                            | 74.6             | 7.1587 $\pm$ 1.34%                                | 97.1                         | 1.63                                       | 3.469 $\pm$ 0.048             |
| ( -05                                                                              | 1218.56 $\pm$ 111%                                      | 77.987 $\pm$ 5853%                                      | 408.072 $\pm$ 108%                            | 0.65             | 48.048 $\pm$ 151%                                 | 11.8                         | 0.17                                       | 23.16 $\pm$ 34.8)             |
| -06                                                                                | 1.3261 $\pm$ 15.1%                                      | 5.2038 $\pm$ 92.0%                                      | 7.4364 $\pm$ 0.45%                            | 9.8              | 7.0473 $\pm$ 0.95%                                | 94.8                         | 2.56                                       | 3.416 $\pm$ 0.034             |
| -07                                                                                | 0.4761 $\pm$ 27.3%                                      | -                                                       | 7.0536 $\pm$ 0.38%                            | -                | 6.9121 $\pm$ 0.67%                                | 98.0                         | 3.32                                       | 3.350 $\pm$ 0.025             |
| ( -08                                                                              | 351.456 $\pm$ 5.76%                                     | -                                                       | 109.547 $\pm$ 5.03%                           | -                | 5.7518 $\pm$ 50.5%                                | 5.3                          | 1.18                                       | 2.788 $\pm$ 1.406)            |
| -09                                                                                | 0.5592 $\pm$ 21.5%                                      | 4.7790 $\pm$ 56.0%                                      | 7.1549 $\pm$ 0.39%                            | 10.7             | 6.9922 $\pm$ 0.64%                                | 97.7                         | 4.02                                       | 3.389 $\pm$ 0.024             |
| -10                                                                                | 0.0607 $\pm$ 438%                                       | 10.6153 $\pm$ 58.4%                                     | 7.1800 $\pm$ 0.57%                            | 4.8              | 7.1697 $\pm$ 1.23%                                | 99.9                         | 1.74                                       | 3.475 $\pm$ 0.044             |
|                                                                                    |                                                         | Arithmetic mean K/Ca (n = 7)                            |                                               | 18.3 $\pm$ 24.9  |                                                   | Arithmetic mean age (n = 8)  |                                            | 3.413 $\pm$ 0.046             |
|                                                                                    |                                                         |                                                         |                                               |                  |                                                   | Weighted mean age (n = 8)    |                                            | 3.396 $\pm$ 0.017             |
| <i>08-034B anorthoclase from pumice clast; J = 2.689E-4 <math>\pm</math> 0.30%</i> |                                                         |                                                         |                                               |                  |                                                   |                              |                                            |                               |
| 5634-01                                                                            | 2.4888 $\pm$ 9.04%                                      | 9.8730 $\pm$ 47.9%                                      | 7.8823 $\pm$ 0.45%                            | 5.2              | 7.1535 $\pm$ 1.04%                                | 90.8                         | 2.64                                       | 3.467 $\pm$ 0.038             |
| -02                                                                                | 0.8064 $\pm$ 20.7%                                      | 12.4219 $\pm$ 28.0%                                     | 7.4100 $\pm$ 0.39%                            | 4.1              | 7.1804 $\pm$ 0.79%                                | 96.9                         | 3.23                                       | 3.480 $\pm$ 0.029             |
| -03                                                                                | 23.8385 $\pm$ 0.91%                                     | 5.6084 $\pm$ 33.5%                                      | 14.4721 $\pm$ 0.42%                           | 9.1              | 7.4309 $\pm$ 1.23%                                | 51.3                         | 12.1                                       | 3.601 $\pm$ 0.045             |
| -04                                                                                | 10.5856 $\pm$ 1.69%                                     | 9.1395 $\pm$ 23.2%                                      | 10.2824 $\pm$ 0.30%                           | 5.6              | 7.1602 $\pm$ 0.91%                                | 69.6                         | 6.93                                       | 3.470 $\pm$ 0.033             |
| -05                                                                                | 0.5078 $\pm$ 30.5%                                      | 1.7140 $\pm$ 202%                                       | 7.2185 $\pm$ 0.46%                            | 29.8             | 7.0685 $\pm$ 0.79%                                | 97.9                         | 3.29                                       | 3.426 $\pm$ 0.029             |

|   |     |                |                |                              |             |                |                             |      |                 |
|---|-----|----------------|----------------|------------------------------|-------------|----------------|-----------------------------|------|-----------------|
| ( | -06 | 1735.2 ± 23.7% | 121.918 ± 539% | 5433.12 ± 23.4%              | 0.4         | 305.82 ± 28.1% | 5.6                         | 12.5 | 142.57 ± 38.54) |
|   | -07 | 6.2420 ± 2.58% | 0.8392 ± 358%  | 8.9972 ± 0.37%               | 60.8        | 7.1521 ± 0.81% | 79.5                        | 5.19 | 3.466 ± 0.030   |
|   | -08 | 1.6922 ± 11.4% | 2.1483 ± 205%  | 7.5868 ± 0.47%               | 23.8        | 7.0871 ± 0.94% | 93.4                        | 2.68 | 3.435 ± 0.034   |
|   | -09 | 1.7762 ± 10.8% | -              | 7.8181 ± 0.42%               | -           | 7.2922 ± 0.89% | 93.3                        | 3.27 | 3.534 ± 0.033   |
|   | -10 | 8.8009 ± 3.79% | -              | 10.0123 ± 0.49%              | -           | 7.4103 ± 1.45% | 74.0                        | 2.92 | 3.591 ± 0.053   |
|   |     |                |                | Arithmetic mean K/Ca (n = 7) | 19.8 ± 20.7 |                | Arithmetic mean age (n = 9) |      | 3.497 ± 0.064   |
|   |     |                |                |                              |             |                | Weighted mean age (n = 9)   |      | 3.480 ± 0.021   |

---

$\lambda = 5.543 \times 10^{-10} \text{ a}^{-1}$  Fluence monitor: 92-176 from Fish Canyon Tuff, reference age 28.1 Ma (Spell & McDougall, 2003)

$(^{36}\text{Ar}/^{37}\text{Ar})_{\text{Ca}} = 2.57 (\pm 0.25) \times 10^{-4}$      $(^{39}\text{Ar}/^{37}\text{Ar})_{\text{Ca}} = 6.91 (\pm 0.94) \times 10^{-4}$      $(^{40}\text{Ar}/^{39}\text{Ar})_{\text{K}} = 8.0 (\pm 3.0) \times 10^{-4}$

$^{40}\text{Ar}^*$  - radiogenic  $^{40}\text{Ar}$      $^{39}\text{Ar}_{\text{K}}$  - K-derived  $^{39}\text{Ar}$

Results within parentheses have been excluded from the calculation of the mean

Quoted error for each age includes estimated error in J

Irradiated for one hour in CLICIT facility, Triga reactor, Oregon State University

Supplementary Table 7. Results of laser fusion  $^{40}\text{Ar}/^{39}\text{Ar}$  dating of single crystals of anorthoclase from three pumice clasts in the Naibar Tuff, Lonyumun Member, Koobi Fora Formation, Kenya

| Run No.                                                                            | $^{36}\text{Ar}/^{39}\text{Ar}$<br>$\times 10^{-3} \pm \text{c.v.}$ | $^{37}\text{Ar}/^{39}\text{Ar}$<br>$\times 10^{-2} \pm \text{c.v.}$ | $^{40}\text{Ar}/^{39}\text{Ar}$<br>$\pm \text{c.v.}$ | K/Ca            | $^{40}\text{Ar}^*/^{39}\text{Ar}_K$<br>$\pm \text{c.v.}$ | % $^{40}\text{Ar}^*$ | $^{40}\text{Ar}$ mol<br>ge<br>$\times 10^{-14}$ | Calculated<br>Ma $\pm 1 \text{ s.d.}$ |
|------------------------------------------------------------------------------------|---------------------------------------------------------------------|---------------------------------------------------------------------|------------------------------------------------------|-----------------|----------------------------------------------------------|----------------------|-------------------------------------------------|---------------------------------------|
| <i>08-036A anorthoclase from pumice clast; J = 2.689E-4 <math>\pm</math> 0.30%</i> |                                                                     |                                                                     |                                                      |                 |                                                          |                      |                                                 |                                       |
| (5627-01                                                                           | 198.52 $\pm$ 0.79%                                                  | 8.0281 $\pm$ 24.6%                                                  | 66.4563 $\pm$ 0.36%                                  | 6.4             | 7.7981 $\pm$ 7.59%                                       | 11.7                 | 70.1                                            | 3.779 $\pm$ 0.287)                    |
| -02                                                                                | 1.8728 $\pm$ 8.78%                                                  | 10.109 $\pm$ 36.9%                                                  | 8.7957 $\pm$ 0.39%                                   | 5.1             | 8.2490 $\pm$ 0.71%                                       | 93.8                 | 4.59                                            | 3.997 $\pm$ 0.031                     |
| -03                                                                                | 1.3071 $\pm$ 6.45%                                                  | -                                                                   | 8.6337 $\pm$ 0.42%                                   | -               | 8.2473 $\pm$ 0.51%                                       | 95.5                 | 7.84                                            | 3.997 $\pm$ 0.024                     |
| -04                                                                                | 1.1279 $\pm$ 12.4%                                                  | 1.6206 $\pm$ 262%                                                   | 8.6204 $\pm$ 0.40%                                   | 31.5            | 8.2870 $\pm$ 0.64%                                       | 96.1                 | 4.56                                            | 4.016 $\pm$ 0.028                     |
| -05                                                                                | 1.1123 $\pm$ 16.1%                                                  | 6.1373 $\pm$ 88.0%                                                  | 8.7310 $\pm$ 0.44%                                   | 8.3             | 8.4059 $\pm$ 0.77%                                       | 96.3                 | 3.52                                            | 4.073 $\pm$ 0.034                     |
| 06                                                                                 | 1.6406 $\pm$ 7.75%                                                  | 6.5579 $\pm$ 63.3%                                                  | 8.7896 $\pm$ 0.38%                                   | 7.8             | 8.3087 $\pm$ 0.60%                                       | 94.5                 | 4.49                                            | 4.026 $\pm$ 0.027                     |
| -07                                                                                | 3.2890 $\pm$ 2.88%                                                  | 2.8655 $\pm$ 58.1%                                                  | 9.1802 $\pm$ 0.40%                                   | 17.8            | 8.2090 $\pm$ 0.55%                                       | 89.4                 | 10.1                                            | 3.978 $\pm$ 0.025                     |
| -08                                                                                | 1.4157 $\pm$ 8.17%                                                  | -                                                                   | 8.8166 $\pm$ 0.39%                                   | -               | 8.3972 $\pm$ 0.57%                                       | 95.2                 | 6.60                                            | 4.069 $\pm$ 0.026                     |
| -09                                                                                | 1.3384 $\pm$ 9.83%                                                  | 1.8548 $\pm$ 2.92%                                                  | 8.5665 $\pm$ 0.39%                                   | 27.5            | 8.1712 $\pm$ 0.62%                                       | 95.4                 | 4.79                                            | 3.960 $\pm$ 0.027                     |
| -10                                                                                | 0.7849 $\pm$ 10.2%                                                  | 1.4885 $\pm$ 135%                                                   | 8.4435 $\pm$ 0.38%                                   | 3.4             | 8.2115 $\pm$ 0.48%                                       | 97.3                 | 7.79                                            | 3.979 $\pm$ 0.023                     |
|                                                                                    |                                                                     | Arithmetic mean K/Ca (n = 7)                                        |                                                      | 14.2 $\pm$ 11.6 | Arithmetic mean age (n = 9)                              |                      |                                                 | 4.011 $\pm$ 0.040                     |
|                                                                                    |                                                                     |                                                                     |                                                      |                 | Weighted mean age (n = 9)                                |                      |                                                 | 4.006 $\pm$ 0.017                     |
| <i>08-036B anorthoclase from pumice clast; J = 2.690E-4 <math>\pm</math> 0.26%</i> |                                                                     |                                                                     |                                                      |                 |                                                          |                      |                                                 |                                       |
| 5655-01                                                                            | 0.4543 $\pm$ 39.6%                                                  | 0.2227 $\pm$ 1665%                                                  | 8.4407 $\pm$ 0.42%                                   | 229.4           | 8.3052 $\pm$ 0.76%                                       | 98.4                 | 3.29                                            | 4.026 $\pm$ 0.033                     |
| -02                                                                                | 0.1418 $\pm$ 133%                                                   | -                                                                   | 8.5640 $\pm$ 0.46%                                   | -               | 8.5212 $\pm$ 0.79%                                       | 99.5                 | 3.20                                            | 4.131 $\pm$ 0.034                     |
| -03                                                                                | 0.8799 $\pm$ 21.5%                                                  | 9.0011 $\pm$ 42.5%                                                  | 8.6696 $\pm$ 0.45%                                   | 5.7             | 8.4158 $\pm$ 0.81%                                       | 97.1                 | 2.90                                            | 4.079 $\pm$ 0.034                     |
| -04                                                                                | 0.9367 $\pm$ 14.5%                                                  | 4.1966 $\pm$ 74.4%                                                  | 8.5064 $\pm$ 0.39%                                   | 12.2            | 8.2321 $\pm$ 0.63%                                       | 96.8                 | 3.74                                            | 3.991 $\pm$ 0.027                     |
| -05                                                                                | 0.3984 $\pm$ 27.9%                                                  | 2.6085 $\pm$ 84.3%                                                  | 8.4183 $\pm$ 0.36%                                   | 19.6            | 8.3013 $\pm$ 0.53%                                       | 98.6                 | 5.66                                            | 4.024 $\pm$ 0.024                     |
| -06                                                                                | 2.6636 $\pm$ 4.73%                                                  | 2.0821 $\pm$ 97.5%                                                  | 9.2099 $\pm$ 0.34%                                   | 24.5            | 8.4233 $\pm$ 0.58%                                       | 91.5                 | 6.35                                            | 4.083 $\pm$ 0.026                     |
| -07                                                                                | 9.9745 $\pm$ 2.03%                                                  | 5.1794 $\pm$ 51.6%                                                  | 11.3194 $\pm$ 0.37%                                  | 9.9             | 8.3747 $\pm$ 0.89%                                       | 74.0                 | 6.00                                            | 4.060 $\pm$ 0.038                     |
| -08                                                                                | 1.1986 $\pm$ 19.3%                                                  | 4.2129 $\pm$ 126%                                                   | 8.6067 $\pm$ 0.48%                                   | 12.1            | 8.2548 $\pm$ 0.96%                                       | 95.9                 | 2.44                                            | 4.002 $\pm$ 0.039                     |
| -09                                                                                | 1.6510 $\pm$ 9.72%                                                  | 8.6348 $\pm$ 36.0%                                                  | 8.8537 $\pm$ 0.44%                                   | 5.9             | 8.3715 $\pm$ 0.72%                                       | 94.6                 | 4.14                                            | 4.058 $\pm$ 0.031                     |
| -10                                                                                | 0.8467 $\pm$ 40.0%                                                  | 9.4496 $\pm$ 60.0%                                                  | 8.8305 $\pm$ 0.57%                                   | 5.4             | 8.5868 $\pm$ 1.29%                                       | 97.2                 | 1.89                                            | 4.162 $\pm$ 0.055                     |
|                                                                                    |                                                                     | Arithmetic mean K/Ca (n = 9)                                        |                                                      | 36.1 $\pm$ 72.8 | Arithmetic mean age (n = 10)                             |                      |                                                 | 4.062 $\pm$ 0.055                     |
|                                                                                    |                                                                     |                                                                     |                                                      |                 | Weighted mean age (n = 10)                               |                      |                                                 | 4.051 $\pm$ 0.018                     |
| <i>08-036C anorthoclase from pumice clast; J = 2.690E-4 <math>\pm</math> 0.26%</i> |                                                                     |                                                                     |                                                      |                 |                                                          |                      |                                                 |                                       |
| 5656-01                                                                            | 0.7596 $\pm$ 18.6%                                                  | -                                                                   | 8.5425 $\pm$ 0.39%                                   | -               | 8.3184 $\pm$ 0.64%                                       | 97.4                 | 3.89                                            | 4.032 $\pm$ 0.028                     |
| -02                                                                                | 1.6619 $\pm$ 10.7%                                                  | -                                                                   | 8.8560 $\pm$ 0.46%                                   | -               | 8.3652 $\pm$ 0.78%                                       | 94.5                 | 3.21                                            | 4.055 $\pm$ 0.033                     |
| -03                                                                                | 0.8542 $\pm$ 12.6%                                                  | -                                                                   | 8.5197 $\pm$ 0.33%                                   | -               | 8.2663 $\pm$ 0.51%                                       | 97.0                 | 5.94                                            | 4.007 $\pm$ 0.023                     |
| -04                                                                                | 3.6178 $\pm$ 4.95%                                                  | 2.3909 $\pm$ 203%                                                   | 9.3546 $\pm$ 0.39%                                   | 21.3            | 8.2863 $\pm$ 0.77%                                       | 88.6                 | 3.96                                            | 4.017 $\pm$ 0.033                     |
| -05                                                                                | 1.6986 $\pm$ 5.93%                                                  | 0.3536 $\pm$ 493%                                                   | 8.8005 $\pm$ 0.42%                                   | 144.3           | 8.2977 $\pm$ 0.57%                                       | 94.3                 | 7.73                                            | 4.022 $\pm$ 0.025                     |
| -06                                                                                | 1.0270 $\pm$ 8.52%                                                  | 3.8027 $\pm$ 40.5%                                                  | 8.4920 $\pm$ 0.42%                                   | 13.4            | 8.1904 $\pm$ 0.53%                                       | 96.5                 | 7.67                                            | 3.970 $\pm$ 0.023                     |
| -07                                                                                | 1.6835 $\pm$ 7.34%                                                  | 0.7518 $\pm$ 331%                                                   | 8.9391 $\pm$ 0.36%                                   | 67.8            | 8.4410 $\pm$ 0.58%                                       | 94.4                 | 5.63                                            | 4.092 $\pm$ 0.026                     |
| -08                                                                                | 0.6728 $\pm$ 18.9%                                                  | 2.0641 $\pm$ 148%                                                   | 8.4746 $\pm$ 0.37%                                   | 24.7            | 8.2762 $\pm$ 0.59%                                       | 97.7                 | 4.13                                            | 4.012 $\pm$ 0.026                     |
| -09                                                                                | 1.6795 $\pm$ 19.8%                                                  | 0.4772 $\pm$ 1580%                                                  | 9.0241 $\pm$ 0.66%                                   | 106.9           | 8.5268 $\pm$ 1.33%                                       | 94.5                 | 1.79                                            | 4.133 $\pm$ 0.056                     |
| -10                                                                                | 1.4652 $\pm$ 13.1%                                                  | 3.3673 $\pm$ 115%                                                   | 8.5757 $\pm$ 0.46%                                   | 15.2            | 8.1441 $\pm$ 0.84%                                       | 95.0                 | 3.37                                            | 3.948 $\pm$ 0.035                     |
|                                                                                    |                                                                     | Arithmetic mean K/Ca (n = 7)                                        |                                                      | 56.3 $\pm$ 52.0 | Arithmetic mean age (n = 10)                             |                      |                                                 | 4.029 $\pm$ 0.054                     |
|                                                                                    |                                                                     |                                                                     |                                                      |                 | Weighted mean age (n = 10)                               |                      |                                                 | 4.020 $\pm$ 0.017                     |

$\lambda = 5.543 \times 10^{-10} \text{ a}^{-1}$  Fluence monitor: 92-176 from Fish Canyon Tuff, reference age 28.1 Ma (Spell & McDougall, 2003)

$(^{36}\text{Ar}/^{37}\text{Ar})_{\text{Ca}} = 2.57 (\pm 0.25) \times 10^{-4}$   $(^{39}\text{Ar}/^{37}\text{Ar})_{\text{Ca}} = 6.91 (\pm 0.94) \times 10^{-4}$   $(^{40}\text{Ar}/^{39}\text{Ar})_{\text{K}} = 8.0 (\pm 3.0) \times 10^{-4}$

$^{40}\text{Ar}^*$  - radiogenic  $^{40}\text{Ar}$   $^{39}\text{Ar}_K$  - K-derived  $^{39}\text{Ar}$

Results within parentheses have been excluded from the calculation of the mean

Quoted error for each age includes estimated error in J

Irradiated for one hour in CLICIT facility, Triga reactor, Oregon State University

Supplementary Table 8. Results of laser fusion  $^{40}\text{Ar}/^{39}\text{Ar}$  dating of single crystals of anorthoclase from three pumice clasts in the Naibar Tuff, Lonyumun Member, Koobi Fora Formation, Kenya

| Run No.                                                             | $^{36}\text{Ar}/^{39}\text{Ar}$<br>$\times 10^{-3} \pm \text{c.v.}$ | $^{37}\text{Ar}/^{39}\text{Ar}$<br>$\times 10^{-2} \pm \text{c.v.}$ | $^{40}\text{Ar}/^{39}\text{Ar}$<br>$\pm \text{c.v.}$ | K/Ca        | $^{40}\text{Ar}^*/^{39}\text{Ar}_K$<br>$\pm \text{c.v.}$ | % $^{40}\text{Ar}^*$         | $^{40}\text{Ar}$ mol<br>ge<br>$\times 10^{-14}$ | Calculated<br>Ma $\pm 1 \text{ s.d.}$ |
|---------------------------------------------------------------------|---------------------------------------------------------------------|---------------------------------------------------------------------|------------------------------------------------------|-------------|----------------------------------------------------------|------------------------------|-------------------------------------------------|---------------------------------------|
| <i>08-036D anorthoclase from pumice clast; J = 2.690E-4 ± 0.26%</i> |                                                                     |                                                                     |                                                      |             |                                                          |                              |                                                 |                                       |
| 5658-01                                                             | 0.6655 ± 10.4%                                                      | 0.9487 ± 390%                                                       | 8.4771 ± 0.33%                                       | 53.8        | 8.2799 ± 0.42%                                           | 97.7                         | 7.17                                            | 4.014 ± 0.020                         |
| -02                                                                 | 1.2243 ± 6.16%                                                      | 3.6254 ± 96.1%                                                      | 8.6463 ± 0.36%                                       | 14.1        | 8.2859 ± 0.47%                                           | 95.8                         | 8.67                                            | 4.017 ± 0.021                         |
| -03                                                                 | 1.0890 ± 8.08%                                                      | 1.3199 ± 308%                                                       | 8.6165 ± 0.39%                                       | 38.7        | 8.2944 ± 0.51%                                           | 96.3                         | 7.27                                            | 4.021 ± 0.023                         |
| -04                                                                 | 1.5795 ± 4.56%                                                      | 3.2881 ± 84.0%                                                      | 8.7602 ± 0.36%                                       | 15.5        | 8.2947 ± 0.46%                                           | 94.7                         | 9.83                                            | 4.021 ± 0.021                         |
| -05                                                                 | 0.9363 ± 13.7%                                                      | 13.421 ± 41.2%                                                      | 8.5308 ± 0.37%                                       | 3.8         | 8.2636 ± 0.59%                                           | 96.9                         | 4.20                                            | 4.006 ± 0.026                         |
| -06                                                                 | 0.6964 ± 16.5%                                                      | 10.289 ± 57.7%                                                      | 8.4460 ± 0.40%                                       | 5.0         | 8.2473 ± 0.58%                                           | 97.6                         | 4.19                                            | 3.998 ± 0.025                         |
| -07                                                                 | 0.4188 ± 42.7%                                                      | 5.8934 ± 150%                                                       | 8.5138 ± 0.41%                                       | 8.7         | 8.3928 ± 0.75%                                           | 98.6                         | 2.83                                            | 4.068 ± 0.032                         |
| -08                                                                 | 1.2071 ± 11.4%                                                      | -                                                                   | 8.7429 ± 0.39%                                       | -           | 8.3850 ± 0.63%                                           | 95.9                         | 4.25                                            | 4.065 ± 0.028                         |
| -09                                                                 | 2.5918 ± 3.40%                                                      | 0.6050 ± 537%                                                       | 9.0524 ± 0.37%                                       | 84.3        | 8.2856 ± 0.51%                                           | 91.5                         | 8.00                                            | 4.017 ± 0.023                         |
| -10                                                                 | 2.8700 ± 4.63%                                                      | 2.0886 ± 233%                                                       | 9.1437 ± 0.35%                                       | 24.4        | 8.2959 ± 0.61%                                           | 90.7                         | 5.58                                            | 4.022 ± 0.027                         |
|                                                                     |                                                                     | Arithmetic mean K/Ca (n = 9)                                        |                                                      | 27.6 ± 26.9 |                                                          | Arithmetic mean age (n = 10) |                                                 | 4.025 ± 0.023                         |
|                                                                     |                                                                     |                                                                     |                                                      |             |                                                          | Weighted mean age (n = 10)   |                                                 | 4.021 ± 0.012                         |
| <i>08-036E anorthoclase from pumice clast; J = 2.690E-4 ± 0.26%</i> |                                                                     |                                                                     |                                                      |             |                                                          |                              |                                                 |                                       |
| 5659-01                                                             | 1.1169 ± 11.5%                                                      | 4.5105 ± 132%                                                       | 8.6168 ± 0.38%                                       | 11.3        | 8.2891 ± 0.60%                                           | 96.2                         | 4.16                                            | 4.018 ± 0.026                         |
| -02                                                                 | 12.6281 ± 1.75%                                                     | -                                                                   | 12.1826 ± 0.33%                                      | -           | 8.4496 ± 0.94%                                           | 69.4                         | 6.58                                            | 4.096 ± 0.040                         |
| -03                                                                 | 0.8412 ± 21.8%                                                      | 4.7343 ± 98.7%                                                      | 8.5220 ± 0.38%                                       | 10.8        | 8.2758 ± 0.76%                                           | 97.1                         | 5.86                                            | 4.012 ± 0.032                         |
| -04                                                                 | 2.2454 ± 8.02%                                                      | -                                                                   | 9.1081 ± 0.43%                                       | -           | 8.4436 ± 0.78%                                           | 92.7                         | 3.42                                            | 4.093 ± 0.034                         |
| -05                                                                 | 7.8864 ± 2.35%                                                      | -                                                                   | 10.7119 ± 0.37%                                      | -           | 8.3810 ± 0.81%                                           | 78.2                         | 5.17                                            | 4.063 ± 0.035                         |
| -06                                                                 | 2.2736 ± 4.39%                                                      | -                                                                   | 8.9587 ± 0.32%                                       | -           | 8.2872 ± 0.50%                                           | 92.5                         | 5.65                                            | 4.017 ± 0.023                         |
| ( -07                                                               | 203.945 ± 1.96%                                                     | 390.509 ± 21.7%                                                     | 67.3148 ± 1.47%                                      | 0.1         | 7.3618 ± 12.3%                                           | 10.9                         | 2.80                                            | 3.569 ± 0.438                         |
| -08                                                                 | 0.9561 ± 14.1%                                                      | 8.0160 ± 73.0%                                                      | 8.6056 ± 0.39%                                       | 6.4         | 8.3282 ± 0.62%                                           | 96.8                         | 3.79                                            | 4.037 ± 0.027                         |
| -09                                                                 | 6.9616 ± 7.72%                                                      | -                                                                   | 10.5980 ± 0.50%                                      | -           | 8.5399 ± 1.94%                                           | 80.6                         | 3.28                                            | 4.140 ± 0.081                         |
| -10                                                                 | 2.1115 ± 6.76%                                                      | 0.5764 ± 1060%                                                      | 9.0482 ± 0.37%                                       | 88.6        | 8.4233 ± 0.64%                                           | 93.1                         | 4.87                                            | 4.083 ± 0.028                         |
|                                                                     |                                                                     | Arithmetic mean K/Ca (n = 4)                                        |                                                      | 29.3 ± 39.6 |                                                          | Arithmetic mean age (n = 9)  |                                                 | 4.062 ± 0.044                         |
|                                                                     |                                                                     |                                                                     |                                                      |             |                                                          | Weighted mean age (n = 9)    |                                                 | 4.046 ± 0.016                         |
| <i>08-036F anorthoclase from pumice clast; J = 2.690E-4 ± 0.26%</i> |                                                                     |                                                                     |                                                      |             |                                                          |                              |                                                 |                                       |
| 5660-01                                                             | 0.8806 ± 18.4%                                                      | 3.7638 ± 195%                                                       | 8.4347 ± 0.42%                                       | 13.6        | 8.1762 ± 0.73%                                           | 96.9                         | 3.31                                            | 3.964 ± 0.031                         |
| -02                                                                 | 1.0938 ± 9.89%                                                      | 11.1040 ± 55.5%                                                     | 8.6159 ± 0.35%                                       | 4.6         | 8.3002 ± 0.53%                                           | 96.3                         | 4.55                                            | 4.024 ± 0.024                         |
| -03                                                                 | 5.1813 ± 1.73%                                                      | 0.6018 ± 387%                                                       | 9.6764 ± 0.36%                                       | 8.5         | 8.1443 ± 0.54%                                           | 84.2                         | 11.7                                            | 3.948 ± 0.024                         |
| -04                                                                 | 0.5763 ± 14.0%                                                      | 4.1258 ± 103%                                                       | 8.4685 ± 0.31%                                       | 12.4        | 8.3008 ± 0.43%                                           | 98.0                         | 5.89                                            | 4.024 ± 0.020                         |
| -05                                                                 | 2.9969 ± 4.86%                                                      | 6.2022 ± 76.0%                                                      | 9.1302 ± 0.33%                                       | 8.2         | 8.2572 ± 0.63%                                           | 90.4                         | 5.26                                            | 4.003 ± 0.027                         |
| -06                                                                 | 1.1882 ± 11.7%                                                      | -                                                                   | 8.7272 ± 0.41%                                       | -           | 8.3748 ± 0.64%                                           | 96.0                         | 3.93                                            | 4.060 ± 0.028                         |
| -07                                                                 | 0.9216 ± 12.3%                                                      | 1.4662 ± 438%                                                       | 8.4654 ± 0.38%                                       | 34.8        | 8.1929 ± 0.57%                                           | 96.8                         | 3.68                                            | 3.972 ± 0.025                         |
| -08                                                                 | 2.1763 ± 7.39%                                                      | -                                                                   | 8.8656 ± 0.43%                                       | -           | 8.2211 ± 0.73%                                           | 92.7                         | 3.40                                            | 3.985 ± 0.031                         |
| -09                                                                 | 0.9636 ± 10.5%                                                      | -                                                                   | 8.5606 ± 0.35%                                       | -           | 8.2751 ± 0.51%                                           | 96.7                         | 5.48                                            | 4.011 ± 0.023                         |
| ( -10                                                               | 7.7986 ± 2.36%                                                      | -                                                                   | 10.7975 ± 0.35%                                      | -           | 8.4918 ± 0.79%                                           | 78.7                         | 5.98                                            | 4.116 ± 0.034                         |
|                                                                     |                                                                     | Arithmetic mean K/Ca (n = 6)                                        |                                                      | 13.7 ± 10.8 |                                                          | Arithmetic mean age (n = 9)  |                                                 | 3.999 ± 0.035                         |
|                                                                     |                                                                     |                                                                     |                                                      |             |                                                          | Weighted mean age (n = 9)    |                                                 | 4.001 ± 0.015                         |

$\lambda = 5.543 \times 10^{-10} \text{ a}^{-1}$  Fluence monitor: 92-176 from Fish Canyon Tuff, reference age 28.1 Ma (Spell & McDougall, 2003)

$(^{36}\text{Ar}/^{37}\text{Ar})_{\text{Ca}} = 2.57 (\pm 0.25) \times 10^{-4}$   $(^{39}\text{Ar}/^{37}\text{Ar})_{\text{Ca}} = 6.91 (\pm 0.94) \times 10^{-4}$   $(^{40}\text{Ar}/^{39}\text{Ar})_{\text{K}} = 8.0 (\pm 3.0) \times 10^{-4}$

$^{40}\text{Ar}^*$  - radiogenic  $^{40}\text{Ar}$   $^{39}\text{Ar}_K$  - K-derived  $^{39}\text{Ar}$

Results within parentheses have been excluded from the calculation of the mean

Quoted error for each age includes estimated error in J

Irradiated for one hour in CLICIT facility, Triga reactor, Oregon State University

Supplementary Table 9. Results of laser fusion  $^{40}\text{Ar}/^{39}\text{Ar}$  dating of single crystals of anorthoclase from a trachyte from the eastern flanks of Kakorinya Volcano, The Barrier, northern Kenya at 2.3213°N, 36.6098°E

| Run No.                                                                        | $^{36}\text{Ar}/^{39}\text{Ar}$<br>x $10^{-3} \pm$ c.v. | $^{37}\text{Ar}/^{39}\text{Ar}$<br>x $10^{-2} \pm$ c.v. | $^{40}\text{Ar}/^{39}\text{Ar}$<br>$\pm$ c.v. | K/Ca           | $^{40}\text{Ar}^*/^{39}\text{Ar}_K$<br>$\pm$ c.v. | % $^{40}\text{Ar}^*$ | $^{40}\text{Ar}$ mol<br>x $10^{-15}$ | Calculated Age<br>Ma $\pm$ 1 s.d. |
|--------------------------------------------------------------------------------|---------------------------------------------------------|---------------------------------------------------------|-----------------------------------------------|----------------|---------------------------------------------------|----------------------|--------------------------------------|-----------------------------------|
| <i>K06-453 anorthoclase from trachyte; J = 2.624E-4 <math>\pm</math> 0.17%</i> |                                                         |                                                         |                                               |                |                                                   |                      |                                      |                                   |
| BE4866                                                                         | 2.88 $\pm$ 8.00%                                        | 1.256 $\pm$ 5.97%                                       | 1.0330 $\pm$ 0.93%                            | 34.2           | 0.18226 $\pm$ 37.0%                               | 17.6                 | 0.72                                 | 0.0863 $\pm$ 0.03195              |
| BE4867                                                                         | 3.32 $\pm$ 4.82%                                        | 3.141 $\pm$ 2.01%                                       | 1.2174 $\pm$ 0.62%                            | 13.7           | 0.23927 $\pm$ 19.4%                               | 19.7                 | 1.23                                 | 0.1133 $\pm$ 0.0220               |
| BE4869                                                                         | 11.38 $\pm$ 2.28%                                       | 4.517 $\pm$ 2.50%                                       | 3.5570 $\pm$ 0.88%                            | 9.5            | 0.19788 $\pm$ 36.6%                               | 5.6                  | 2.42                                 | 0.0937 $\pm$ 0.0343               |
| BE4870                                                                         | 2.56 $\pm$ 5.08%                                        | 1.316 $\pm$ 6.00%                                       | 0.9804 $\pm$ 0.96%                            | 32.7           | 0.22501 $\pm$ 16.5%                               | 22.9                 | 0.69                                 | 0.1065 $\pm$ 0.0175               |
| BE4872                                                                         | 9.46 $\pm$ 1.59%                                        | 1.957 $\pm$ 3.37%                                       | 2.9571 $\pm$ 0.17%                            | 22.0           | 0.16110 $\pm$ 27.4%                               | 5.5                  | 2.63                                 | 0.0763 $\pm$ 0.0209               |
| BE4873                                                                         | 5.16 $\pm$ 2.71%                                        | 2.239 $\pm$ 1.88%                                       | 1.7469 $\pm$ 0.22%                            | 19.2           | 0.22315 $\pm$ 18.5%                               | 12.8                 | 3.33                                 | 0.1056 $\pm$ 0.0195               |
| BE4875                                                                         | 3.80 $\pm$ 1.58%                                        | 1.679 $\pm$ 2.62%                                       | 1.3445 $\pm$ 0.24%                            | 25.6           | 0.22307 $\pm$ 7.56%                               | 16.6                 | 3.13                                 | 0.1056 $\pm$ 0.0080               |
| BE4876                                                                         | 3.30 $\pm$ 2.12%                                        | 1.313 $\pm$ 2.89%                                       | 1.1967 $\pm$ 0.26%                            | 32.7           | 0.22090 $\pm$ 8.80%                               | 18.5                 | 2.52                                 | 0.1046 $\pm$ 0.0092               |
| BE4878                                                                         | 3.55 $\pm$ 3.66%                                        | 2.458 $\pm$ 2.07%                                       | 1.2324 $\pm$ 0.32%                            | 17.5           | 0.18302 $\pm$ 20.5%                               | 14.9                 | 1.26                                 | 0.0866 $\pm$ 0.0178               |
| BE4879                                                                         | 4.21 $\pm$ 3.80%                                        | 2.133 $\pm$ 4.55%                                       | 1.4182 $\pm$ 0.57%                            | 20.2           | 0.17629 $\pm$ 27.3%                               | 12.4                 | 0.98                                 | 0.0834 $\pm$ 0.0228               |
| BE4881                                                                         | 18.38 $\pm$ 0.92%                                       | 2.596 $\pm$ 2.39%                                       | 5.6804 $\pm$ 0.20%                            | 16.6           | 0.25101 $\pm$ 20.2%                               | 4.4                  | 6.90                                 | 0.1188 $\pm$ 0.0240               |
| BE4882                                                                         | 2.34 $\pm$ 4.27%                                        | 2.372 $\pm$ 2.28%                                       | 0.9553 $\pm$ 0.47%                            | 18.1           | 0.26427 $\pm$ 11.5%                               | 27.7                 | 0.90                                 | 0.1251 $\pm$ 0.0144               |
| Arithmetic mean K/Ca (n = 12)                                                  |                                                         |                                                         |                                               | 21.8 $\pm$ 7.9 | Arithmetic mean age (n = 12)                      |                      | 0.1005 $\pm$ 0.0152                  |                                   |
|                                                                                |                                                         |                                                         |                                               |                | Weighted mean age (n = 12)                        |                      | 0.1041 $\pm$ 0.0044                  |                                   |

$\lambda = 5.543 \times 10^{-10} \text{ a}^{-1}$  Fluence monitor: Sanidine from Fish Canyon Tuff, reference age 28.1 Ma (Spell & McDougall, 2003)

$(^{36}\text{Ar}/^{37}\text{Ar})_{\text{Ca}} = 2.64 \times 10^{-4}$   $(^{39}\text{Ar}/^{37}\text{Ar})_{\text{Ca}} = 6.73 \times 10^{-4}$   $(^{40}\text{Ar}/^{39}\text{Ar})_{\text{K}} = 8.6 \times 10^{-4}$

$^{40}\text{Ar}^*$  - radiogenic  $^{40}\text{Ar}$   $^{39}\text{Ar}_K$  - K-derived  $^{39}\text{Ar}$

Quoted error for each age includes estimated error in J

Irradiated for one hour in CLICIT facility, Triga reactor, Oregon State University

Analyses by B. Singer and B. Jicha, Department of Geology, University of Wisconsin, Wisconsin, USA

Supplementary Table 10. Magnetic measurements on the Naibar Tuff and the White Tuff of the Koobi Fora Formation

| Demagnetization<br>Field (mT)                                                            | Declination.<br>(degrees) | Inclination<br>(degrees) | M<br>(emu) | X(N)<br>(emu) | Y(E)<br>(emu) | Z(down)<br>(emu) |
|------------------------------------------------------------------------------------------|---------------------------|--------------------------|------------|---------------|---------------|------------------|
| Naibar Tuff (K09-680; 4.0966°N, 36.2796°E; Il Naibar, Koobi Fora region, northern Kenya) |                           |                          |            |               |               |                  |
| 0                                                                                        | 357.6                     | -20.6                    | 5.29E-05   | 4.95E-05      | -2.05E-06     | -1.86E-05        |
| 10                                                                                       | 281.5                     | -56.7                    | 8.89E-06   | 9.70E-07      | -4.78E-06     | -7.43E-06        |
| 18                                                                                       | 198.0                     | -14.3                    | 1.15E-05   | -1.06E-05     | -3.46E-06     | -2.84E-06        |
| 25                                                                                       | 182.3                     | -20.0                    | 1.57E-05   | -1.48E-05     | -5.85E-07     | -5.37E-06        |
| 35                                                                                       | 195.4                     | 8.3                      | 1.84E-05   | -1.75E-05     | -4.81E-06     | 2.65E-06         |
| 45                                                                                       | 186.8                     | 6.8                      | 1.60E-05   | -1.58E-05     | -1.90E-06     | 1.91E-06         |
| 55                                                                                       | 162.9                     | -23.4                    | 1.63E-05   | -1.43E-05     | 4.40E-06      | -6.47E-06        |
| 65                                                                                       | 160.7                     | -16.5                    | 1.38E-05   | -1.25E-05     | 4.38E-06      | -3.93E-06        |
| 77                                                                                       | 195.7                     | -22.2                    | 8.48E-06   | -7.56E-06     | -2.13E-06     | -3.21E-06        |
| 89                                                                                       | 178.9                     | -11.0                    | 2.05E-05   | -2.01E-05     | 3.94E-07      | -3.90E-06        |
| 100                                                                                      | 184.1                     | -7.0                     | 6.35E-06   | -6.28E-06     | -4.48E-07     | -7.77E-07        |
| White Tuff (K09-685; 3.9623°N, 36.3109°E; Area 104, Koobi Fora region, northern Kenya)   |                           |                          |            |               |               |                  |
| 0                                                                                        | 20.3                      | -66.1                    | 2.97E-05   | 1.13E-05      | 4.17E-06      | -2.72E-05        |
| 5                                                                                        | 192.9                     | -51.3                    | 2.02E-05   | -1.23E-05     | -2.82E-06     | -1.57E-05        |
| 10                                                                                       | 200.1                     | -22.4                    | 2.65E-05   | -2.30E-05     | -8.45E-06     | -1.01E-05        |
| 12                                                                                       | 191.2                     | -14.0                    | 2.25E-05   | -2.14E-05     | -4.24E-06     | -5.43E-06        |
| 20                                                                                       | 201.7                     | -13.5                    | 1.91E-05   | -1.73E-05     | -6.87E-06     | -4.45E-06        |
| 30                                                                                       | 194.1                     | -10.1                    | 1.94E-05   | -1.85E-05     | -4.66E-06     | -3.40E-06        |
| 40                                                                                       | 195.8                     | -9.5                     | 1.72E-05   | -1.63E-05     | -4.61E-06     | -2.83E-06        |
| 50                                                                                       | 197.4                     | -6.3                     | 1.49E-05   | -1.41E-05     | -4.43E-06     | -1.63E-06        |
| 65                                                                                       | 203.6                     | 3.2                      | 1.41E-05   | -1.29E-05     | -5.61E-06     | 7.86E-07         |
| 80                                                                                       | 198.1                     | -5.7                     | 1.24E-05   | -1.17E-05     | -3.83E-06     | -1.23E-06        |
| 100                                                                                      | 204.8                     | 0.5                      | 1.11E-05   | -1.01E-05     | -4.66E-06     | 9.87E-08         |

The samples were measured at the University of Utah, Department of Geology & Geophysics, on a 760 DC-SQUID magnetometer manufactured by 2G Enterprises. Demagnetization utilized a 1-axis degausser (2G Enterprises) with a maximum peak field of 2kG. All work was performed in a shielded room, where the residual field ranges from a few 10s of gammas to about 200 gammas.

Inside the mu-metal shield surrounding the AF demagnetizing coil, the field is 2-5 gammas.

Repeat demagnetization at 100mT revealed only trivial ARM.

Minor AR was detected at the highest three demagnetization steps of sample K09-685.

Supplementary Table 11. Analyses of glasses and locations of samples of the Orange Tuff of the Koobi Fora Formation, Tuff J from the type area of the Shungura Formation, and the Kayle Tuff-1 and Kayle Tuff-2 of the Konso Formation. All compositional data are in weight percent latitude and longitude are in decimal degrees

|                                                                | M,N   | No   | SiO <sub>2</sub> | TiO <sub>2</sub> | ZrO <sub>2</sub> | Al <sub>2</sub> O <sub>3</sub> | Fe <sub>2</sub> O <sub>3</sub> | MnO  | MgO  | CaO  | Na <sub>2</sub> O | K <sub>2</sub> O | F    | Cl   | Sum   | less O | mp H <sub>2</sub> O | Total  | N. lat. | E. long |
|----------------------------------------------------------------|-------|------|------------------|------------------|------------------|--------------------------------|--------------------------------|------|------|------|-------------------|------------------|------|------|-------|--------|---------------------|--------|---------|---------|
| Kayle Tuff-2, Konso Formation (from WoldeGabriel et al., 2005) |       |      |                  |                  |                  |                                |                                |      |      |      |                   |                  |      |      |       |        |                     |        |         |         |
| 956-6 (EMX)                                                    |       | 13   | 70.08            | 0.42             |                  | 9.69                           | 6.16                           | 0.29 | 0.04 | 0.36 | 3.96              | 3.03             |      |      | 94.03 |        |                     |        | --      | --      |
| 1 $\sigma$                                                     |       |      | 0.56             | 0.05             |                  | 0.07                           | 0.09                           | 0.04 | 0.01 | 0.02 | 0.71              | 0.71             |      |      | 1.05  |        |                     |        |         |         |
| 956-6 (DCP)                                                    |       |      | 68.82            | 0.42             | 0.10             | 9.97                           | 6.18                           | 0.34 | 0.02 | 0.37 | 3.60              | 3.85             |      |      | 93.67 |        |                     |        | --      | --      |
| 1 $\sigma$                                                     |       |      | --               | --               |                  | --                             | --                             | --   | --   | --   | --                | --               |      |      | --    |        |                     |        |         |         |
| Kayle Tuff-1, Konso Formation (from WoldeGabriel et al., 2005) |       |      |                  |                  |                  |                                |                                |      |      |      |                   |                  |      |      |       |        |                     |        |         |         |
| 956-7 (EMX)                                                    |       | 33   | 70.25            | 0.09             |                  | 11.41                          | 1.97                           | 0.05 | 0.00 | 0.34 | 3.79              | 4.54             |      |      | 92.42 |        |                     |        | --      | --      |
| 1 $\sigma$                                                     |       |      | 0.58             | 0.05             |                  | 0.09                           | 0.09                           | 0.02 | 0.00 | 0.01 | 0.29              | 0.21             |      |      | 0.81  |        |                     |        |         |         |
| 956-7 (DCP)                                                    |       |      | 71.86            | 0.09             | 0.05             | 11.66                          | 1.89                           | 0.06 | 0.03 | 0.34 | 4.11              | 4.68             |      |      | 94.76 |        |                     |        | --      | --      |
| 1 $\sigma$                                                     |       |      | --               | --               |                  | --                             | --                             | --   | --   | --   | --                | --               |      |      | --    |        |                     |        |         |         |
| Orange Tuff and Tuff J                                         |       |      |                  |                  |                  |                                |                                |      |      |      |                   |                  |      |      |       |        |                     |        |         |         |
| Principal mode                                                 |       |      |                  |                  |                  |                                |                                |      |      |      |                   |                  |      |      |       |        |                     |        |         |         |
| Samples of Tuff J, Shungura Formation                          |       |      |                  |                  |                  |                                |                                |      |      |      |                   |                  |      |      |       |        |                     |        |         |         |
| ETH08-233                                                      | 1,2   | 19   | 73.09            | 0.09             | 0.08             | 11.77                          | 1.97                           | 0.06 | 0.01 | 0.33 | 4.10              | 3.62             | 0.26 | 0.22 | 95.63 | 0.18   | 6.23                | 101.68 | 5.0431  | 35.9933 |
| 1 $\sigma$                                                     | 1,2   | 19   | 0.60             | 0.03             | 0.05             | 0.30                           | 0.06                           | 0.02 | 0.01 | 0.01 | 0.40              | 0.40             | 0.03 | 0.01 | 0.91  | 0.01   | 0.90                | 0.41   |         |         |
| ETH08-234                                                      | 1,2   | 12   | 73.47            | 0.08             | 0.08             | 11.87                          | 2.01                           | 0.05 | 0.01 | 0.33 | 4.11              | 3.67             | 0.26 | 0.23 | 96.25 | 0.18   | 4.81                | 100.88 | 5.0431  | 35.9933 |
| 1 $\sigma$                                                     | 1,2   | 12   | 0.31             | 0.02             | 0.05             | 0.15                           | 0.05                           | 0.03 | 0.01 | 0.01 | 0.24              | 0.38             | 0.03 | 0.01 | 0.89  | 0.01   | 0.84                | 0.27   |         |         |
| ETH08-235                                                      | 1,2   | 28   | 73.30            | 0.08             | 0.08             | 11.99                          | 1.89                           | 0.05 | 0.01 | 0.33 | 4.09              | 3.66             | 0.24 | 0.21 | 95.98 | 0.17   | 5.80                | 101.62 | 5.0431  | 35.9933 |
| 1 $\sigma$                                                     | 1,2   | 28   | 0.52             | 0.03             | 0.04             | 0.32                           | 0.08                           | 0.02 | 0.01 | 0.02 | 0.39              | 0.35             | 0.03 | 0.01 | 1.13  | 0.01   | 1.06                | 0.33   |         |         |
| ETH08-237                                                      | 4,4   | 1.00 | 72.78            | 0.12             | 0.07             | 11.78                          | 2.04                           | 0.06 | 0.02 | 0.35 | 3.93              | 3.46             | 0.25 | 0.20 | 95.12 | 0.17   | 5.90                | 100.85 | 5.0431  | 35.9933 |
|                                                                | 4,4-- | --   | --               | --               | --               | --                             | --                             | --   | --   | --   | --                | --               | --   | --   | --    | --     | --                  | --     |         |         |
| Samples of Orange Tuff, Koobi Fora Formation                   |       |      |                  |                  |                  |                                |                                |      |      |      |                   |                  |      |      |       |        |                     |        |         |         |
| K80- 236                                                       | 1,2   | 15   | 73.06            | 0.09             | 0.05             | 11.66                          | 2.00                           | 0.06 | 0.01 | 0.33 | 3.53              | 4.51             | 0.11 | 0.22 | 95.69 | 0.12   | 4.13                | 99.70  | 3.8175  | 36.2617 |
| 1 $\sigma$                                                     | 1,2   | 15   | 0.24             | 0.03             | 0.04             | 0.08                           | 0.06                           | 0.02 | 0.01 | 0.01 | 0.21              | 0.51             | 0.08 | 0.01 | 0.83  | 0.03   | 0.96                | 0.35   |         |         |
| K86-2492                                                       | 1,3   | 8    | 72.62            | 0.09             | --               | 11.67                          | 2.02                           | 0.06 | 0.01 | 0.33 | 2.76              | 4.35             | --   | 0.23 | 94.15 | --     | --                  | --     | 4.177   | 36.426  |
| 1 $\sigma$                                                     | 1,3   | 8    | 0.86             | 0.02             | --               | 0.15                           | 0.10                           | 0.02 | 0.01 | 0.01 | 1.03              | 1.03             | --   | 0.02 | 2.69  | --     | --                  | --     |         |         |
| K84-1816                                                       | 1,2   | 18   | 73.49            | 0.09             | 0.06             | 11.93                          | 2.01                           | 0.06 | 0.01 | 0.34 | 4.20              | 3.80             | 0.09 | 0.23 | 96.36 | 0.11   | 3.77                | 100.02 | 4.1256  | 36.3913 |
| 1 $\sigma$                                                     | 1,2   | 18   | 0.46             | 0.04             | 0.03             | 0.11                           | 0.07                           | 0.02 | 0.01 | 0.02 | 0.13              | 0.77             | 0.10 | 0.01 | 1.03  | 0.04   | 1.08                | 0.28   |         |         |
| K04-343                                                        | 1,2   | 11   | 72.72            | 0.10             | 0.10             | 11.64                          | 1.94                           | 0.04 | 0.01 | 0.32 | 4.11              | 4.61             | 0.17 | 0.23 | 96.07 | 0.14   | 3.69                | 99.62  | 4.1787  | 36.4248 |

|                                              |     |    |       |      |      |       |      |      |      |      |      |      |      |      |       |      |      |        |        |         |
|----------------------------------------------|-----|----|-------|------|------|-------|------|------|------|------|------|------|------|------|-------|------|------|--------|--------|---------|
| 1 $\sigma$                                   | 1,2 | 11 | 0.39  | 0.02 | 0.04 | 0.13  | 0.05 | 0.02 | 0.01 | 0.01 | 0.17 | 0.33 | 0.11 | 0.00 | 0.71  | 0.05 | 0.97 | 0.33   |        |         |
| OMR08-5                                      | 1,2 | 24 | 72.78 | 0.09 | 0.07 | 11.74 | 1.85 | 0.04 | 0.01 | 0.32 | 4.31 | 3.75 | 0.21 | 0.22 | 95.44 | 0.16 | 5.64 | 100.93 | 3.8189 | 36.2608 |
| 1 $\sigma$                                   | 1,2 | 24 | 0.47  | 0.02 | 0.05 | 0.15  | 0.19 | 0.02 | 0.01 | 0.01 | 0.20 | 0.63 | 0.03 | 0.02 | 0.95  | 0.02 | 0.98 | 0.58   |        |         |
| OMR08-6                                      | 1,1 | 9  | 72.56 | 0.09 | 0.07 | 11.74 | 1.95 | 0.05 | 0.01 | 0.33 | 4.14 | 4.73 | 0.08 | 0.23 | 96.03 | 0.11 | 4.87 | 100.79 | 3.8189 | 36.2616 |
| 1 $\sigma$                                   | 1,1 | 9  | 0.59  | 0.02 | 0.04 | 0.24  | 0.05 | 0.01 | 0.01 | 0.01 | 0.22 | 0.42 | 0.09 | 0.02 | 0.93  | 0.04 | 0.97 | 0.22   |        |         |
| OMR08-7                                      | 1,2 | 21 | 72.51 | 0.09 | 0.08 | 11.73 | 1.89 | 0.04 | 0.01 | 0.33 | 4.21 | 4.50 | 0.13 | 0.22 | 95.78 | 0.12 | 4.47 | 100.13 | 3.8189 | 36.2616 |
| 1 $\sigma$                                   | 1,2 | 21 | 0.48  | 0.02 | 0.05 | 0.16  | 0.08 | 0.02 | 0.01 | 0.01 | 0.24 | 0.48 | 0.09 | 0.02 | 0.83  | 0.04 | 1.03 | 0.76   |        |         |
| OMR08-9                                      | 1,1 | 28 | 72.77 | 0.10 | 0.07 | 11.78 | 1.90 | 0.05 | 0.01 | 0.34 | 4.03 | 4.71 | 0.07 | 0.22 | 96.10 | 0.10 | 3.82 | 99.82  | 3.8165 | 36.2594 |
| 1 $\sigma$                                   | 1,1 | 28 | 0.65  | 0.04 | 0.05 | 0.13  | 0.08 | 0.02 | 0.01 | 0.03 | 0.42 | 0.43 | 0.08 | 0.01 | 0.86  | 0.03 | 0.94 | 0.87   |        |         |
| OMR08-11                                     | 1,2 | 21 | 72.87 | 0.09 | 0.08 | 11.87 | 1.93 | 0.05 | 0.01 | 0.33 | 4.41 | 4.12 | 0.09 | 0.22 | 96.11 | 0.11 | 3.63 | 99.64  | 3.8364 | 36.2560 |
| 1 $\sigma$                                   | 1,2 | 21 | 0.70  | 0.03 | 0.05 | 0.26  | 0.05 | 0.02 | 0.01 | 0.03 | 0.28 | 0.55 | 0.10 | 0.02 | 0.85  | 0.04 | 1.50 | 1.04   |        |         |
| Secondary Mode 1                             |     |    |       |      |      |       |      |      |      |      |      |      |      |      |       |      |      |        |        |         |
| Samples of Orange Tuff, Koobi Fora Formation |     |    |       |      |      |       |      |      |      |      |      |      |      |      |       |      |      |        |        |         |
| OMR08-5                                      | 2,2 | 7  | 64.93 | 0.39 | 0.13 | 14.79 | 3.51 | 0.10 | 0.25 | 1.11 | 4.72 | 5.21 | 0.11 | 0.10 | 95.43 | 0.10 | 5.84 | 101.18 | 3.8189 | 36.2608 |
| 1 $\sigma$                                   | 2,2 | 7  | 0.40  | 0.05 | 0.04 | 0.27  | 0.09 | 0.03 | 0.04 | 0.06 | 0.15 | 0.33 | 0.02 | 0.01 | 0.66  | 0.01 | 1.06 | 0.59   |        |         |
| OMR08-7                                      | 2,2 | 5  | 65.79 | 0.36 | 0.09 | 14.54 | 3.38 | 0.09 | 0.20 | 1.02 | 5.01 | 5.31 | 0.07 | 0.11 | 96.05 | 0.09 | 4.60 | 100.56 | 3.8189 | 36.2616 |
| 1 $\sigma$                                   | 2,2 | 5  | 0.34  | 0.04 | 0.07 | 0.38  | 0.08 | 0.03 | 0.06 | 0.08 | 0.20 | 0.14 | 0.02 | 0.02 | 0.59  | 0.01 | 1.33 | 0.81   |        |         |
| OMR08-11                                     | 2,2 | 6  | 66.20 | 0.33 | 0.09 | 14.45 | 3.29 | 0.07 | 0.16 | 0.97 | 4.94 | 5.09 | 0.06 | 0.11 | 95.85 | 0.08 | 3.36 | 99.13  | 3.8364 | 36.2560 |
| 1 $\sigma$                                   | 2,2 | 6  | 1.30  | 0.07 | 0.05 | 0.26  | 0.15 | 0.01 | 0.07 | 0.11 | 0.14 | 0.32 | 0.03 | 0.01 | 0.75  | 0.01 | 0.88 | 0.51   |        |         |
| K86-2492                                     | 2,3 | 4  | 67.45 | 0.32 | 0.14 | 14.60 | 3.50 | 0.11 | 0.12 | 0.97 | 3.48 | 5.36 | 0.12 | 0.13 | 96.03 | 0.11 | 4.17 | 100.36 | 4.177  | 36.426  |
| 1 $\sigma$                                   | 2,3 | 4  | 0.84  | 0.06 | 0.30 | 0.06  | 0.03 | 0.06 | 0.08 | 0.59 | 0.22 | 0.11 | 0.09 |      |       |      |      |        |        |         |
| K84-1816                                     | 2,2 | 2  | 67.12 | 0.32 | 0.15 | 14.66 | 3.50 | 0.12 | 0.13 | 0.96 | 4.38 | 4.84 | 0.09 | 0.12 | 96.49 | 0.10 | 4.24 | 100.63 | 4.1256 | 36.3913 |
| 1 $\sigma$                                   | 2,2 | 2  | 1.18  | 0.11 | 0.11 | 0.18  | 0.01 | 0.01 | 0.03 | 0.02 | 0.01 | 0.90 | 0.01 | 0.00 | 0.18  | 0.01 | 0.32 | 0.13   |        |         |
| K80-236                                      | 2,2 | 2  | 65.72 | 0.40 | 0.09 | 14.80 | 3.61 | 0.15 | 0.27 | 1.10 | 3.65 | 5.29 | 0.06 | 0.11 | 95.44 | 0.09 | 5.03 | 100.39 | 3.8175 | 36.2617 |
| 1 $\sigma$                                   | 2,2 | 2  | 0.83  | 0.05 | 0.10 | 0.01  | 0.08 | 0.03 | 0.06 | 0.05 | 0.53 | 0.54 | 0.01 | 0.00 | 1.78  | 0.00 | 2.13 | 0.35   |        |         |
| Secondary mode 2                             |     |    |       |      |      |       |      |      |      |      |      |      |      |      |       |      |      |        |        |         |
| Samples of Tuff J, Shungura Formation        |     |    |       |      |      |       |      |      |      |      |      |      |      |      |       |      |      |        |        |         |
| ETH08-233                                    | 2,2 | 22 | 70.87 | 0.41 | 0.21 | 10.58 | 4.65 | 0.19 | 0.17 | 0.21 | 3.31 | 2.95 | 0.24 | 0.13 | 94.02 | 0.18 | 7.39 | 101.24 | 5.0431 | 35.9933 |
| 1 $\sigma$                                   | 2,2 | 22 | 1.09  | 0.06 | 0.08 | 0.47  | 0.17 | 0.03 | 0.04 | 0.03 | 0.82 | 0.37 | 0.05 | 0.03 | 1.14  | 0.02 | 0.81 | 0.59   |        |         |
| ETH08-234                                    | 2,2 | 5  | 70.71 | 0.44 | 0.16 | 10.81 | 5.03 | 0.24 | 0.18 | 0.23 | 3.57 | 3.13 | 0.27 | 0.15 | 95.03 | 0.20 | 6.05 | 100.89 | 5.0431 | 35.9933 |
| 1 $\sigma$                                   | 2,2 | 5  | 0.80  | 0.07 | 0.03 | 0.33  | 0.18 | 0.02 | 0.05 | 0.03 | 0.60 | 0.17 | 0.06 | 0.06 | 0.98  | 0.03 | 0.62 | 0.36   |        |         |



|                                             |     |    |       |      |      |       |      |      |      |      |      |      |       |      |       |      |       |        |        |         |
|---------------------------------------------|-----|----|-------|------|------|-------|------|------|------|------|------|------|-------|------|-------|------|-------|--------|--------|---------|
| 780-5J                                      | 1,1 | 16 | 68.30 | 0.43 | 0.16 | 10.97 | 4.83 | 0.23 | 0.21 | 0.25 | 1.82 | 2.67 | 0.11  | 0.11 | 90.23 | 0.12 | 10.20 | 100.31 | 5.044  | 35.994  |
| 1 $\sigma$                                  | 1,1 | 16 | 0.90  | 0.05 | 0.03 | 0.13  | 0.06 | 0.02 | 0.01 | 0.02 | 0.26 | 0.11 | 0.04  | 0.01 | 1.02  | 0.02 | 0.99  | 1.01   |        |         |
| Secondary mode 3                            |     |    |       |      |      |       |      |      |      |      |      |      |       |      |       |      |       |        |        |         |
| Sample of Tuff J, Shungura Formation        |     |    |       |      |      |       |      |      |      |      |      |      |       |      |       |      |       |        |        |         |
| ETH86-293                                   | 1,1 | 6  | 65.89 | 0.51 | 0.04 | 13.49 | 5.36 | 0.25 | 0.36 | 1.09 | 2.20 | 2.68 | -0.13 | 0.09 | 92.09 | 0.02 | 7.94  | 100.01 | 5.044  | 35.994  |
| 1 $\sigma$                                  | 1,1 | 6  | 1.32  | 0.15 | 0.04 | 0.47  | 0.18 | 0.02 | 0.16 | 0.43 | 0.72 | 0.30 | 0.00  | 0.02 | 1.09  | 0.00 | 1.13  | 0.72   |        |         |
| ETH08-237                                   | 2,4 | 9  | 64.48 | 0.64 | 0.09 | 13.73 | 5.55 | 0.23 | 0.39 | 1.20 | 4.26 | 3.34 | 0.19  | 0.09 | 94.35 | 0.16 | 6.98  | 101.17 | 5.0431 | 35.9933 |
| 1 $\sigma$                                  | 2,4 | 9  | 0.70  | 0.08 | 0.03 | 0.28  | 0.10 | 0.04 | 0.06 | 0.17 | 1.13 | 0.53 | 0.04  | 0.01 | 2.16  | 0.02 | 1.34  | 1.18   |        |         |
| Secondary mode 4                            |     |    |       |      |      |       |      |      |      |      |      |      |       |      |       |      |       |        |        |         |
| Sample of Tuff J, Shungura Formation        |     |    |       |      |      |       |      |      |      |      |      |      |       |      |       |      |       |        |        |         |
| ETH08-237                                   | 1,4 | 10 | 68.40 | 0.38 | 0.15 | 11.43 | 5.83 | 0.27 | 0.06 | 0.44 | 2.62 | 2.53 | 0.21  | 0.15 | 92.62 | 0.18 | 8.53  | 100.97 | 5.0431 | 35.9933 |
| 1 $\sigma$                                  | 1,4 | 10 | 0.77  | 0.04 | 0.05 | 0.22  | 0.12 | 0.02 | 0.01 | 0.03 | 0.25 | 0.13 | 0.05  | 0.01 | 1.12  | 0.02 | 0.53  | 0.85   |        |         |
| Secondary mode 5                            |     |    |       |      |      |       |      |      |      |      |      |      |       |      |       |      |       |        |        |         |
| Sample of Orange Tuff, Koobi Fora Formation |     |    |       |      |      |       |      |      |      |      |      |      |       |      |       |      |       |        |        |         |
| K86-2492                                    | 3,3 | 3  | 73.14 | 0.13 |      | 10.61 | 3.12 | 0.13 | 0.04 | 0.17 | 1.76 | 3.52 |       | 0.19 | 92.82 |      |       |        | 4.177  | 36.426  |
| 1 $\sigma$                                  | 3,3 | 3  | 0.91  | 0.02 |      | 0.23  | 0.05 | 0.02 | 0.00 | 0.01 | 1.54 | 1.43 |       | 0.01 | 3.65  |      |       |        |        |         |
| Secondary mode 6                            |     |    |       |      |      |       |      |      |      |      |      |      |       |      |       |      |       |        |        |         |
| Sample of Tuff J, Shungura Formation        |     |    |       |      |      |       |      |      |      |      |      |      |       |      |       |      |       |        |        |         |
| ETH08-235                                   | 2,2 | 12 | 72.17 | 0.35 | 0.22 | 10.39 | 4.34 | 0.16 | 0.14 | 0.19 | 3.28 | 3.11 | 0.27  | 0.13 | 94.85 | 0.19 | 6.82  | 101.48 | 5.0431 | 35.9933 |
| 1 $\sigma$                                  | 2,2 | 12 | 1.66  | 0.05 | 0.07 | 0.43  | 0.17 | 0.03 | 0.04 | 0.03 | 1.14 | 0.55 | 0.06  | 0.02 | 1.42  | 0.03 | 1.25  | 0.50   |        |         |
| Secondary mode 7                            |     |    |       |      |      |       |      |      |      |      |      |      |       |      |       |      |       |        |        |         |
| Sample of Tuff J, Shungura Formation        |     |    |       |      |      |       |      |      |      |      |      |      |       |      |       |      |       |        |        |         |
| ETH08-237                                   | 3,4 | 2  | 70.09 | 0.44 | 0.22 | 10.79 | 4.95 | 0.25 | 0.21 | 0.25 | 3.20 | 3.02 | 0.22  | 0.11 | 93.87 | 0.17 | 6.69  | 100.39 | 5.0431 | 35.9933 |
| 1 $\sigma$                                  | 3,4 | 2  | 0.58  | 0.02 | 0.02 | 0.24  | 0.09 | 0.03 | 0.01 | 0.02 | 0.37 | 0.54 | 0.00  | 0.01 | 1.33  | 0.00 | 0.89  | 0.44   |        |         |

Sample (780-5J) is a collection of small pumices made in 1966 before Tuff J was defined; Haileab (1988) recollected and analysed a sample of the tuff itself (ETH86-293) and found it compositionally distinct. To reconcile these differences, new samples from the type locality were collected in 2008. Three samples in ascending order (ETH08-233, -237, -234) were taken from the 1.2 m gray vitric tuff described by de Heinzelin & Haesaerts (1983), and another sample (ETH08-235) was taken from a distinctly tuffaceous layer 3 m above the base of the vitric tuff. These samples were analysed by electron microprobe following techniques described in Brown & McDougall (2008). Samples of the Orange Tuff from Area 109 at Koobi Fora were also analysed (K80-236, OMR-5, -6, -7, -9, and -11). In addition, a sample (K04-343) from the type locality of the Orange Tuff in Area 130 at Koobi Fora was analysed as well as a sample (K86-2492) from the same area collected by C. Feibel.

Glass shards of many different compositions are present within these samples. Here we list seven compositional types which are supported by three or more individual analyses within a sample, although it is likely that some samples contain at least 11 modes. The dominant mode in the Orange Tuff and in most samples of Tuff J has an iron content of about 2% (as  $\text{Fe}_2\text{O}_3$ ). Samples ETH08-233 and -234 have this as the dominant mode, but only a single shard of this composition was analysed from the intervening sample ETH08-237 in which the dominant mode has

an iron content of ~6% (as  $\text{Fe}_2\text{O}_3$ ), and a second mode that compositionally is similar to sample ETH86-293 reported by Haileab (1988). The second mode in samples ETH08-233 and -234 corresponds instead to the composition of glass in the pumice sample 780-5J. Of the four remaining modes, one is present in three samples of the Orange Tuff, and the other three are known from a single sample each.
